# Supplementary material for: Lanatoside C Induces G2/M Cell Cycle Arrest and Suppresses Cancer Cell Growth by Attenuating MAPK, Wnt, JAK-STAT, and PI3K/AKT/mTOR Signaling Pathways
Source: PubMed Central journal article supplement (PMC6995510; doi:10.3390/biom9120792), 2019-11-27
Supplement: biomolecules-09-00792-s001.pdf [file biomolecules-09-00792-s001.pdf]

Supplementary Data

**Lanatoside C induces G2/M cell cycle arrest and suppresses cancer cell growth by attenuating MAPK, Wnt, JAK-STAT, and PI3K/AKT/mTOR signaling pathways**

Dhanasekhar Reddy<sup>1</sup>, Ranjith Kumavath<sup>1\*</sup>, Preetam Ghosh<sup>2</sup> and Debmalya Barh<sup>3</sup>

| <b>Gene</b>          | <b>Forward primer</b>     | <b>Reverse primer</b>      |
|----------------------|---------------------------|----------------------------|
| <i>Bcl-2</i>         | TTGTGGCCTTCTTTGAGTTCGGTG  | GGTGCCGGTTCAGGTA CT CAGTCA |
| <i>Bax</i>           | CCTGTGCACCAAGGTGCCGGA ACT | CCACCC TGGTCTTGGATCCAGCCC  |
| <i>CDK6</i>          | GGATAAAGTTCCAGAGCCTGGAG   | GCGATGCACTACTCGGTGTGAA     |
| <i>Chk1</i>          | TTGGCTTCCTGCCACATGAT      | TTGCAGTTTGCAGGACAGGA       |
| <i>Chk2</i>          | AGTGGTGGGGAATAAACGCC      | TCTGGCTTTAAGTCACGGTGT A    |
| <i>p53</i>           | CAGCACATGACGGAGGTTGT      | TCATCCAAATACTCCACACGC      |
| <i>MEK1</i>          | TGAGAGCGACGGTTCTCTACT     | CACAATCAGAGTGTCTGT TGT     |
| <i>p44</i>           | ACTATGTCCGAAGCAAGGAT TTC  | CGCCCACTGATAATCTCTGGAG     |
| <i>p38 α</i>         | AACCTGTCTCCAGTGGGCTCT     | CGTAACCCCGTTTTTGTGTCA      |
| <i>SAPK/JNK</i>      | GGGTATGCCAAGAGGACAGA      | GTGTTGGAAAAGTGCCTGG        |
| <i>NF-κβ -P65</i>    | GTCAAAAACGCCACCTCTCAA     | CTCGCATGGAATTTGGAACCG      |
| <i>AKT</i>           | CCTCCACGACATCGCACTG       | TCACAAAGAGCCCTCCATTATCA    |
| <i>STAT3</i>         | CAGCAGCTTGACACACGGTA      | AAACACCAAAGTGGCATGTGA      |
| <i>JAK</i>           | GCCAACGAGGATCTTCGAGC      | CTTCTCGCGTTCCACTTTGC       |
| <i>p62</i>           | GCACCCCAATGTGATCTGC       | CGTACACAAGTCGTAGTCTGG      |
| <i>mTOR</i>          | ATGCAGCTGTCTGGTTCTC       | AATCAGACAGGCACGAAGGG       |
| <i>PI3K</i>          | CCACGACCATCATCAGGTGAA     | CCTCACGGAGGCATTCTAAAGT     |
| <i>β-catenin</i>     | AGCTTCCAGACACGCTATCAT     | CGGTACAACGAGCTGTTTCTAC     |
| <i>c-Myc</i>         | ATGGCCCATACAAAGCCG        | TTTCTGGAGTAGCAGCTCCTAA     |
| <i>Cyclin D1</i>     | GCTGCGAAGTGGAACCATC       | CCTCCTTCTGCACACATTTGAA     |
| <i>c-Jun</i>         | TGACTGCAAAGATGGAAACG      | CAGGGTCATGCTCTGTTTCA       |
| <i>c-Fos</i>         | AAGGGAAAGGAATAAGATGGCT    | GCAAAGCAGACTTCTCATCT       |
| <i>LC3</i>           | GGAGAAATCCGAAGGGAAAG      | TTGAGCTGTAAGCGCCTTCTA      |
| <i>Beclin 1</i>      | CTGGTAGAAGATAAAAACCCGGTG  | AGGTAGAGCGTGGACTATCCG      |
| <i>Sestrin 1</i>     | TGCTTTGGGCCGTTTGGATAA     | TGTAGTGACGATAATGTAGGGGT    |
| <i>MAPK24 (MKK4)</i> | GACGAGGAGCTTATGGTTCTGT    | TTTTCATCCACTGTTGACCGAA     |
| <i>PTEN</i>          | AGGGACGAACTGGTGTAAATGA    | CTGGTCCTTACTTCCCATAGAA     |
| <i>Msk1</i>          | CAACAATCGTTCAAAAGGCCAA    | CGACTGCCTAATGTGTTCCAG      |
| <i>Gsk3A</i>         | GTGCCCCGAGACAGTGTACC      | ACACCTTGACATAGAGGATAGGG    |
| <i>GAPDH</i>         | AACGGGAAGCTTGTCAATGGAAA   | GCATCAGCAGAGGGGGCAGAG      |

**Supplementary Table 1:** List of primers used in this study.

| S.no | Gene/protein     | Expressions (Up/Down) |      |       |
|------|------------------|-----------------------|------|-------|
|      |                  | MCF-7                 | A549 | HepG2 |
| 1    | c-Fos            | ↓                     | ↓    | ↓     |
| 2    | c-Myc            | ↓                     | ↓    | ↓     |
| 3    | c-Jun            | ↓                     | ↓    | ↓     |
| 4    | Chk1             | ↓                     | ↓    | ↓     |
| 5    | Chk2             | ↓                     | ↓    | ↓     |
| 6    | CDK6             | ↓                     | ↓    | ↓     |
| 7    | Cyclin D1        | ↓                     | ↓    | ↓     |
| 8    | MAPK24           | ↓                     | ↓    | ↓     |
| 9    | MEK1             | ↓                     | ↓    | ↓     |
| 10   | p38MAPK          | ↓                     | ↓    | ↓     |
| 11   | p62              | ↓                     | ↓    | ↓     |
| 12   | PI3K             | ↓                     | ↓    | ↓     |
| 13   | AKT              | ↓                     | ↓    | ↓     |
| 14   | mTOR             | ↓                     | ↓    | ↓     |
| 15   | Beclin           | ↓                     | ↓    | ↓     |
| 16   | LC3              | ↓                     | ↓    | ↓     |
| 17   | Sestrin          | ↓                     | ↓    | ↓     |
| 18   | Bcl-2            | ↓                     | ↓    | ↓     |
| 19   | Gsk3 $\alpha$    | ↓                     | ↓    | ↓     |
| 20   | $\beta$ -catenin | ↓                     | ↓    | ↓     |
| 21   | NF-kB            | ↑                     | ↑    | ↑     |
| 22   | Msk1             | ↑                     | ↑    | ↑     |
| 23   | Bax              | ↑                     | ↑    | ↑     |
| 24   | STAT3            | ↑                     | ↓    | ↑     |
| 25   | p53              | ↓                     | ↓    | ↑     |
| 26   | p44              | ↑                     | ↑    | ↓     |
| 27   | JAK              | ↑                     | ↑    | ↓     |
| 28   | SAPK/JNK         | ↑                     | ↓    | ↑     |
| 29   | PTEN             | ↑                     | ↑    | ↓     |

↑ Upregulation ↓ Downregulation

**Supplementary Table 2:** Summary of identified gene/protein expressions in this study with Lanatoside C treatment.

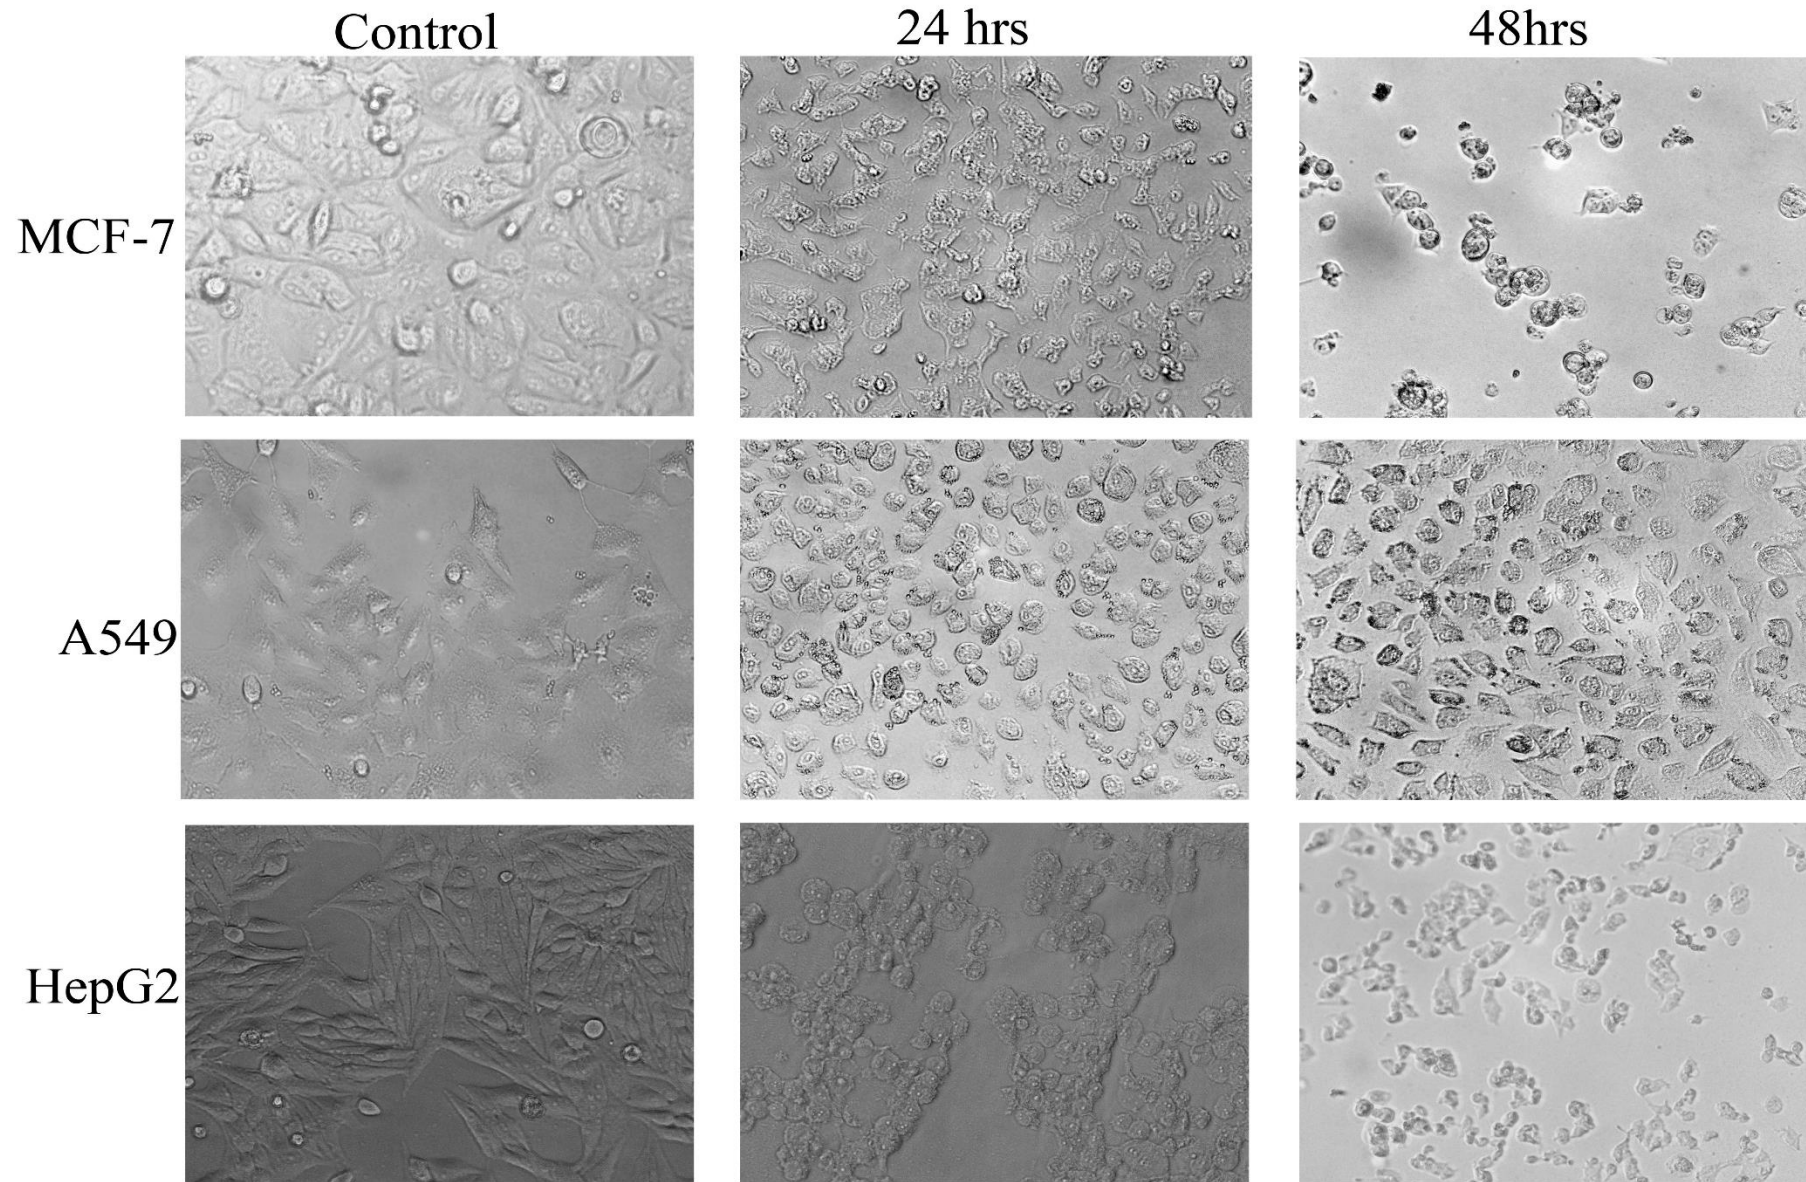

**Supplementary Fig. 1:** MCF-7, A549 and Hepg2 cells were treated with Lanatoside C for 24 or 48 h. Morphological changes in the cells were observed. Representative images were obtained at 40× magnification. Scale bar: 50  $\mu\text{m}$ .

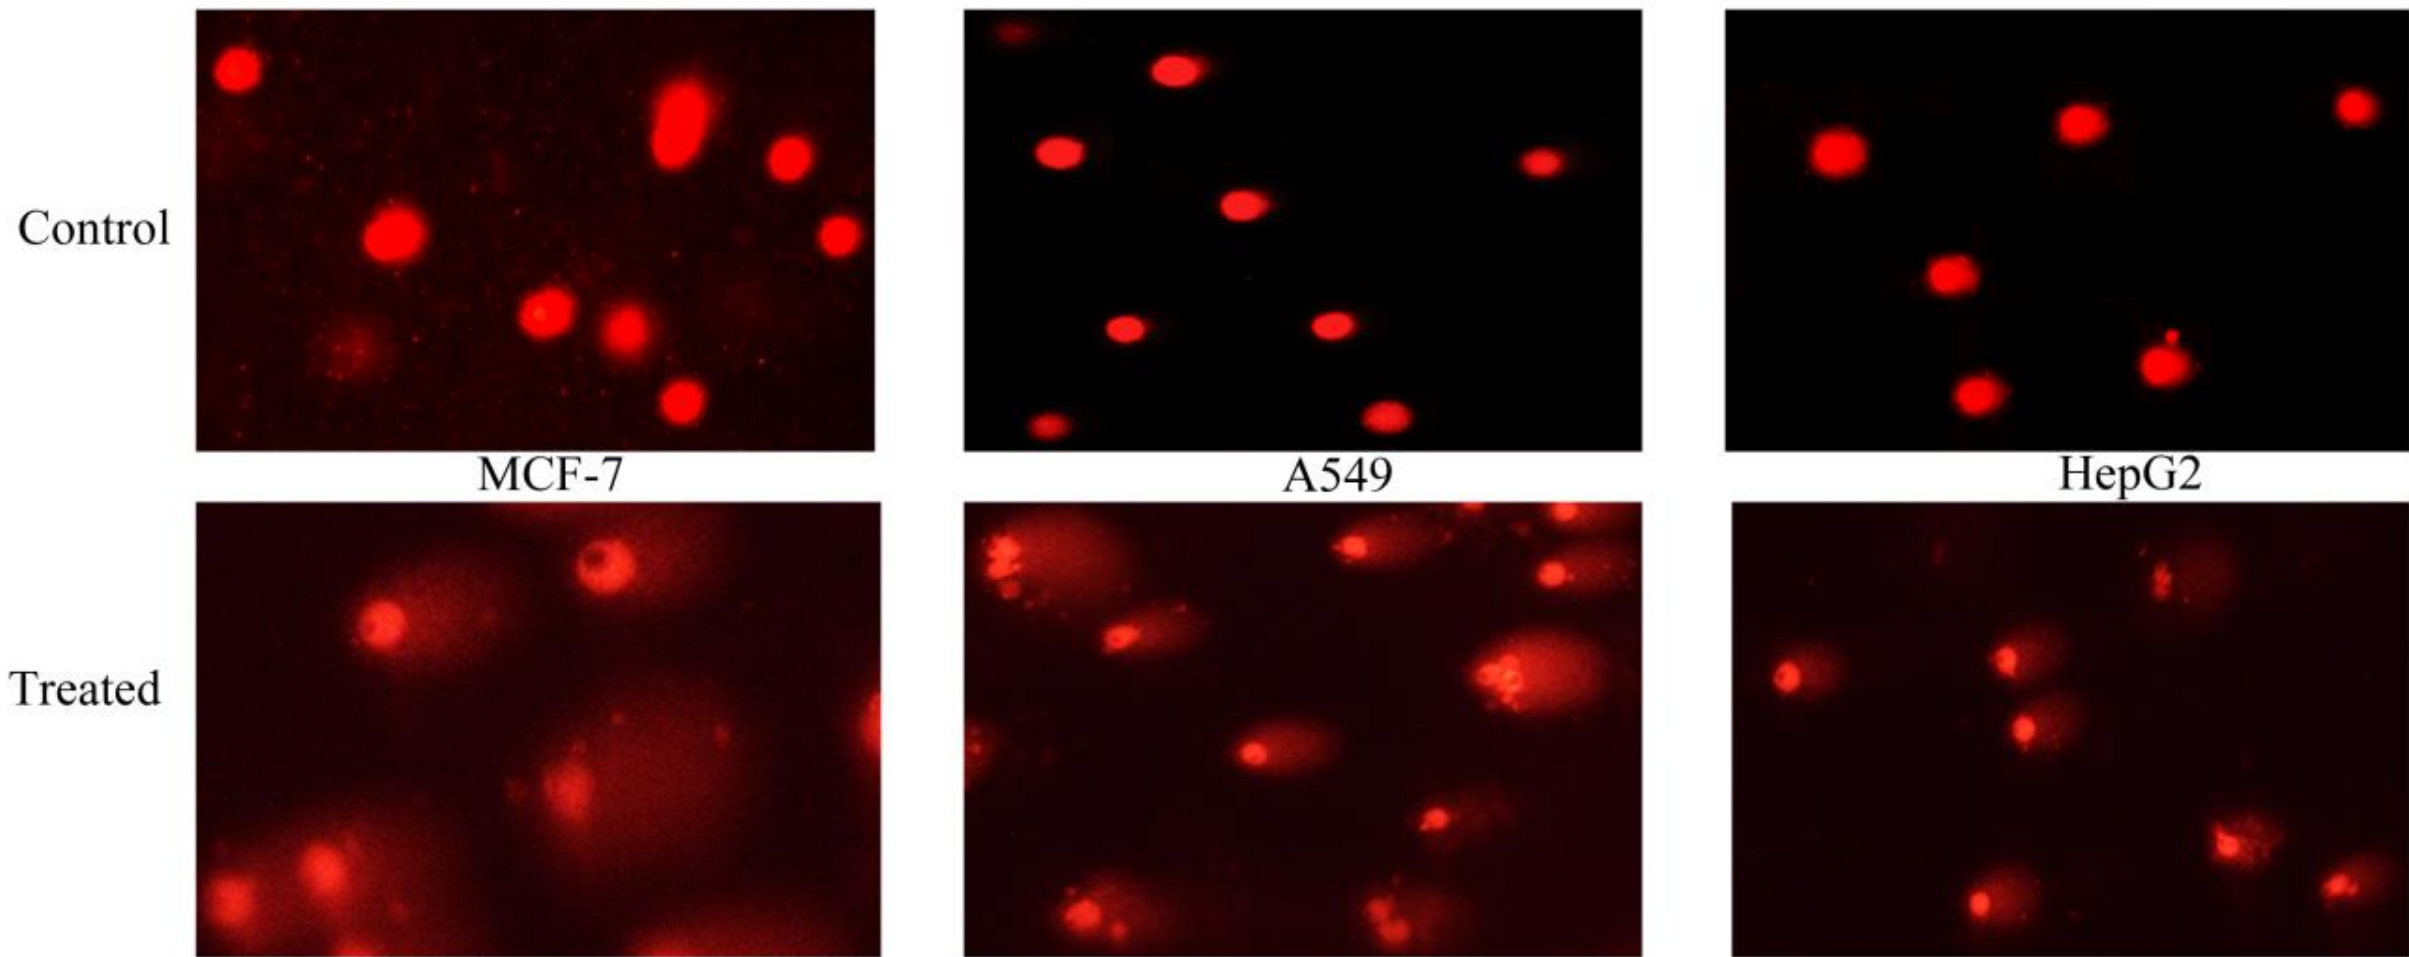

**Supplementary Fig. 2:** Lanatoside C treated cells showing DNA damage in MCF-7 , A549 , and HepG2 cells compared to untreated control cells..

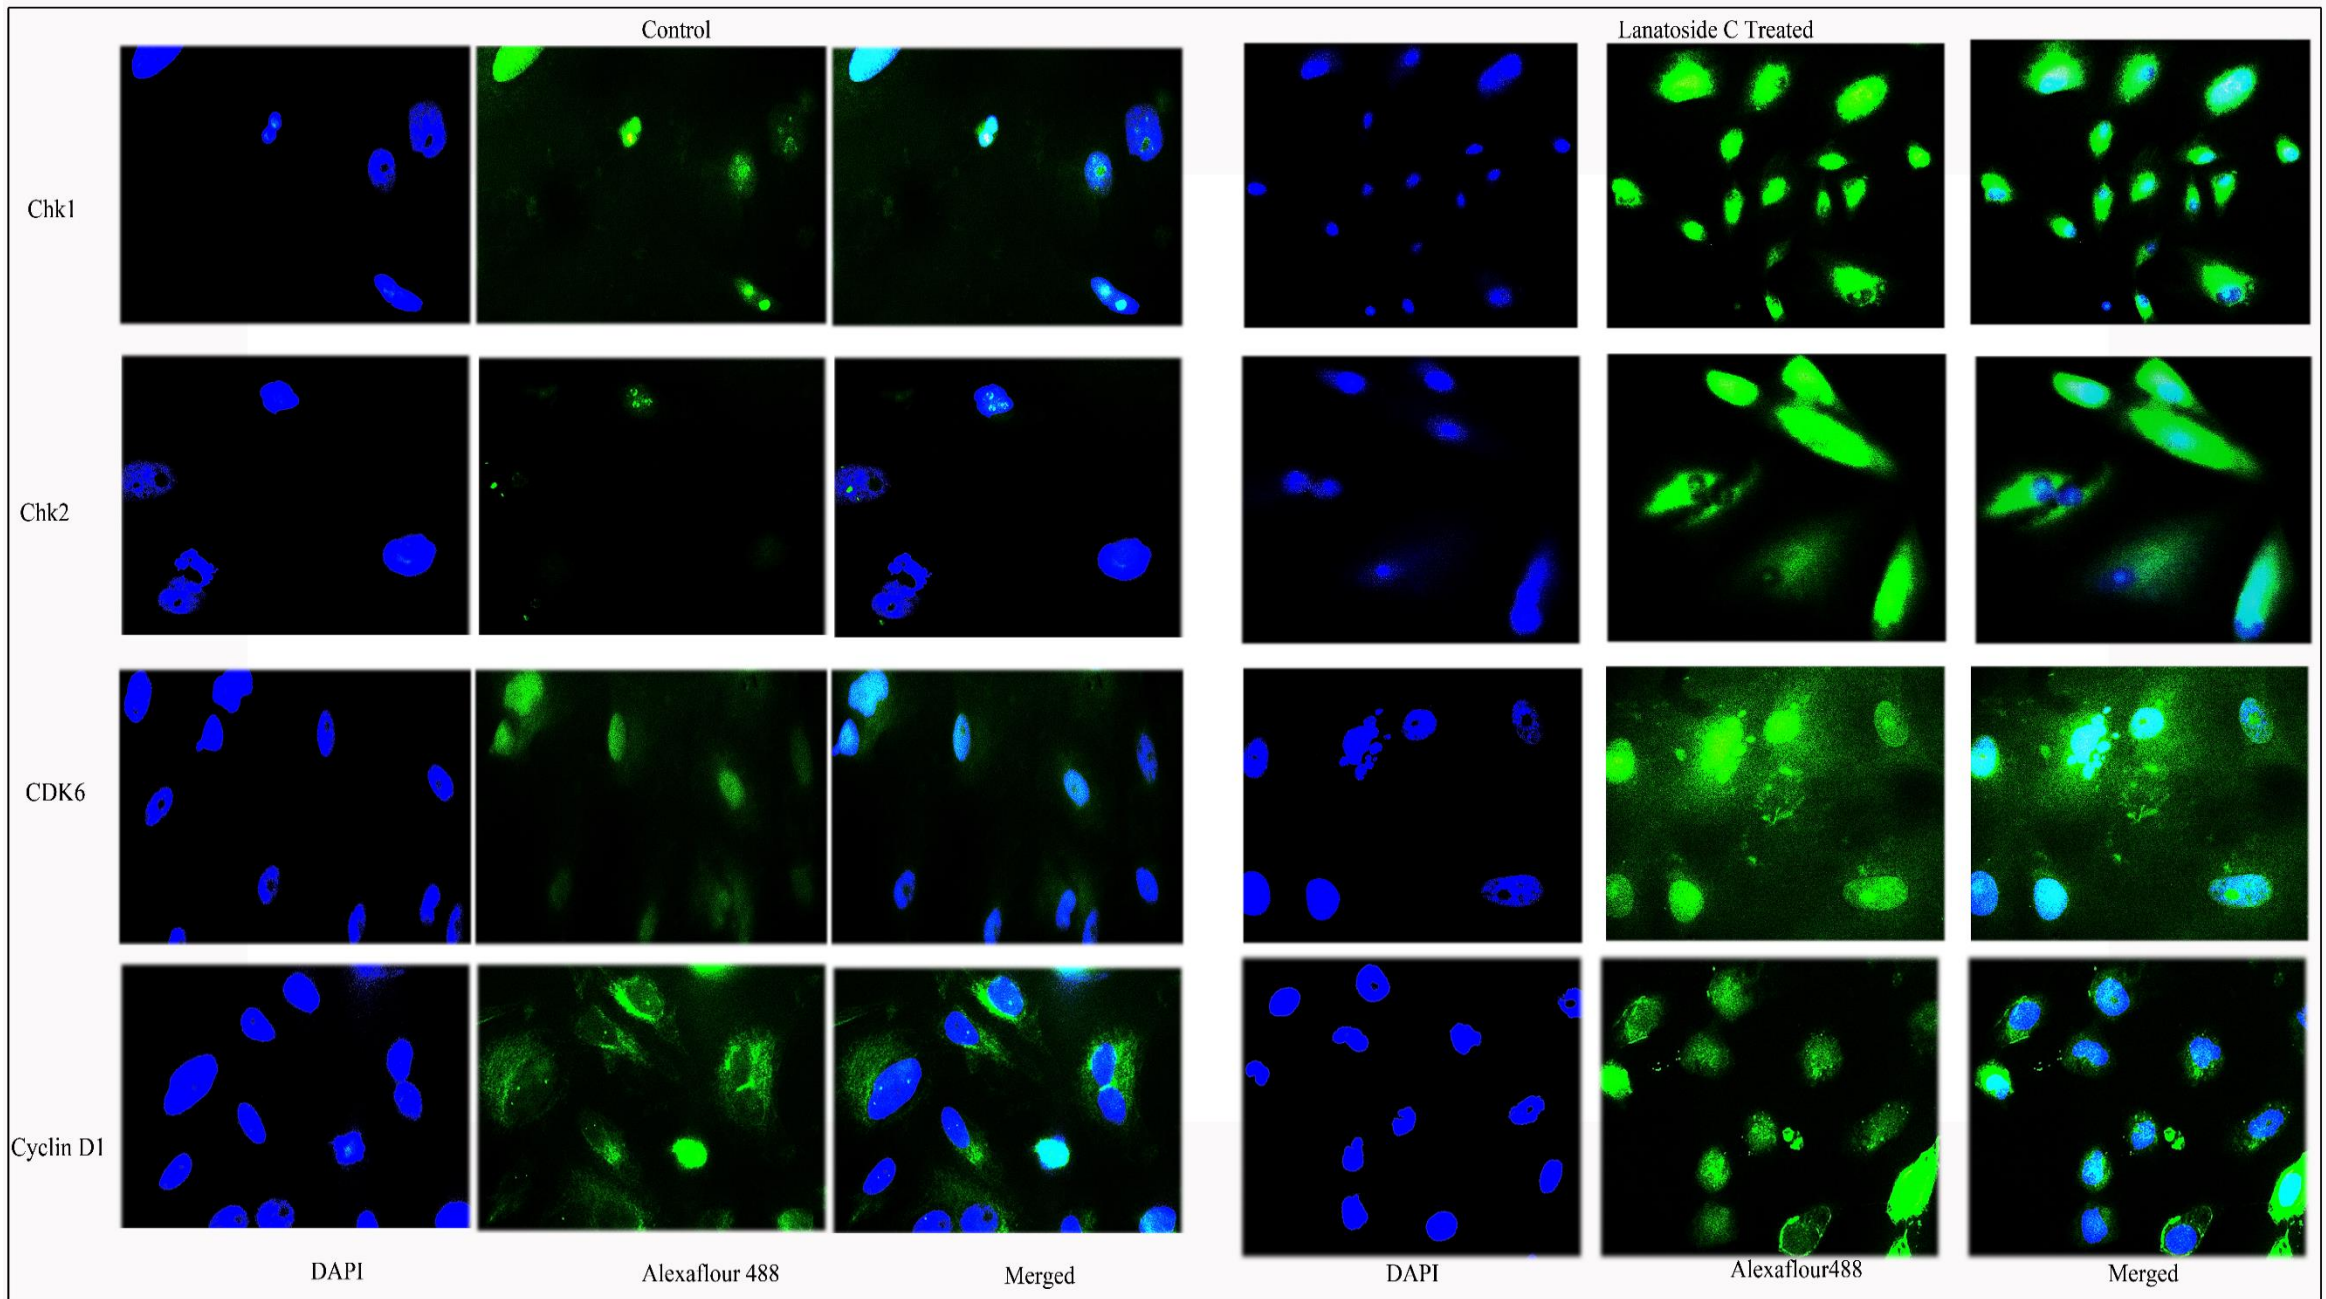

**Supplementary Fig. 3A:** Immunofluorescence imaging for the analysis of protein localisations of Chk1, Chk2, CDK6 and Cyclin D1 in Lanatoside C induced MCF-7 cells.

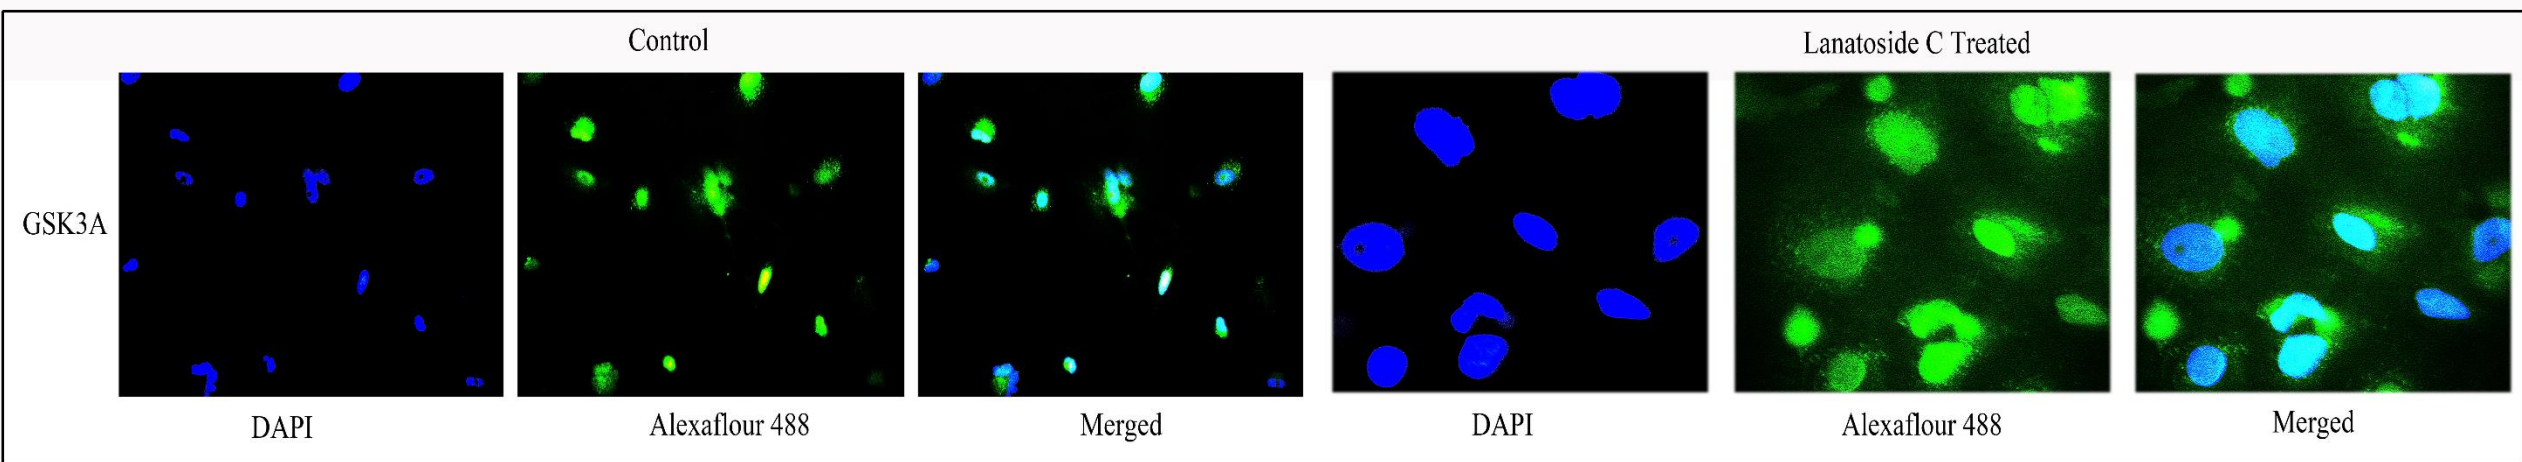

**Supplementary Fig. 3B:** Immunofluorescence imaging for the analysis of protein localisation of Gsk3 $\alpha$  in Lanatoside C induced MCF-7 cells.

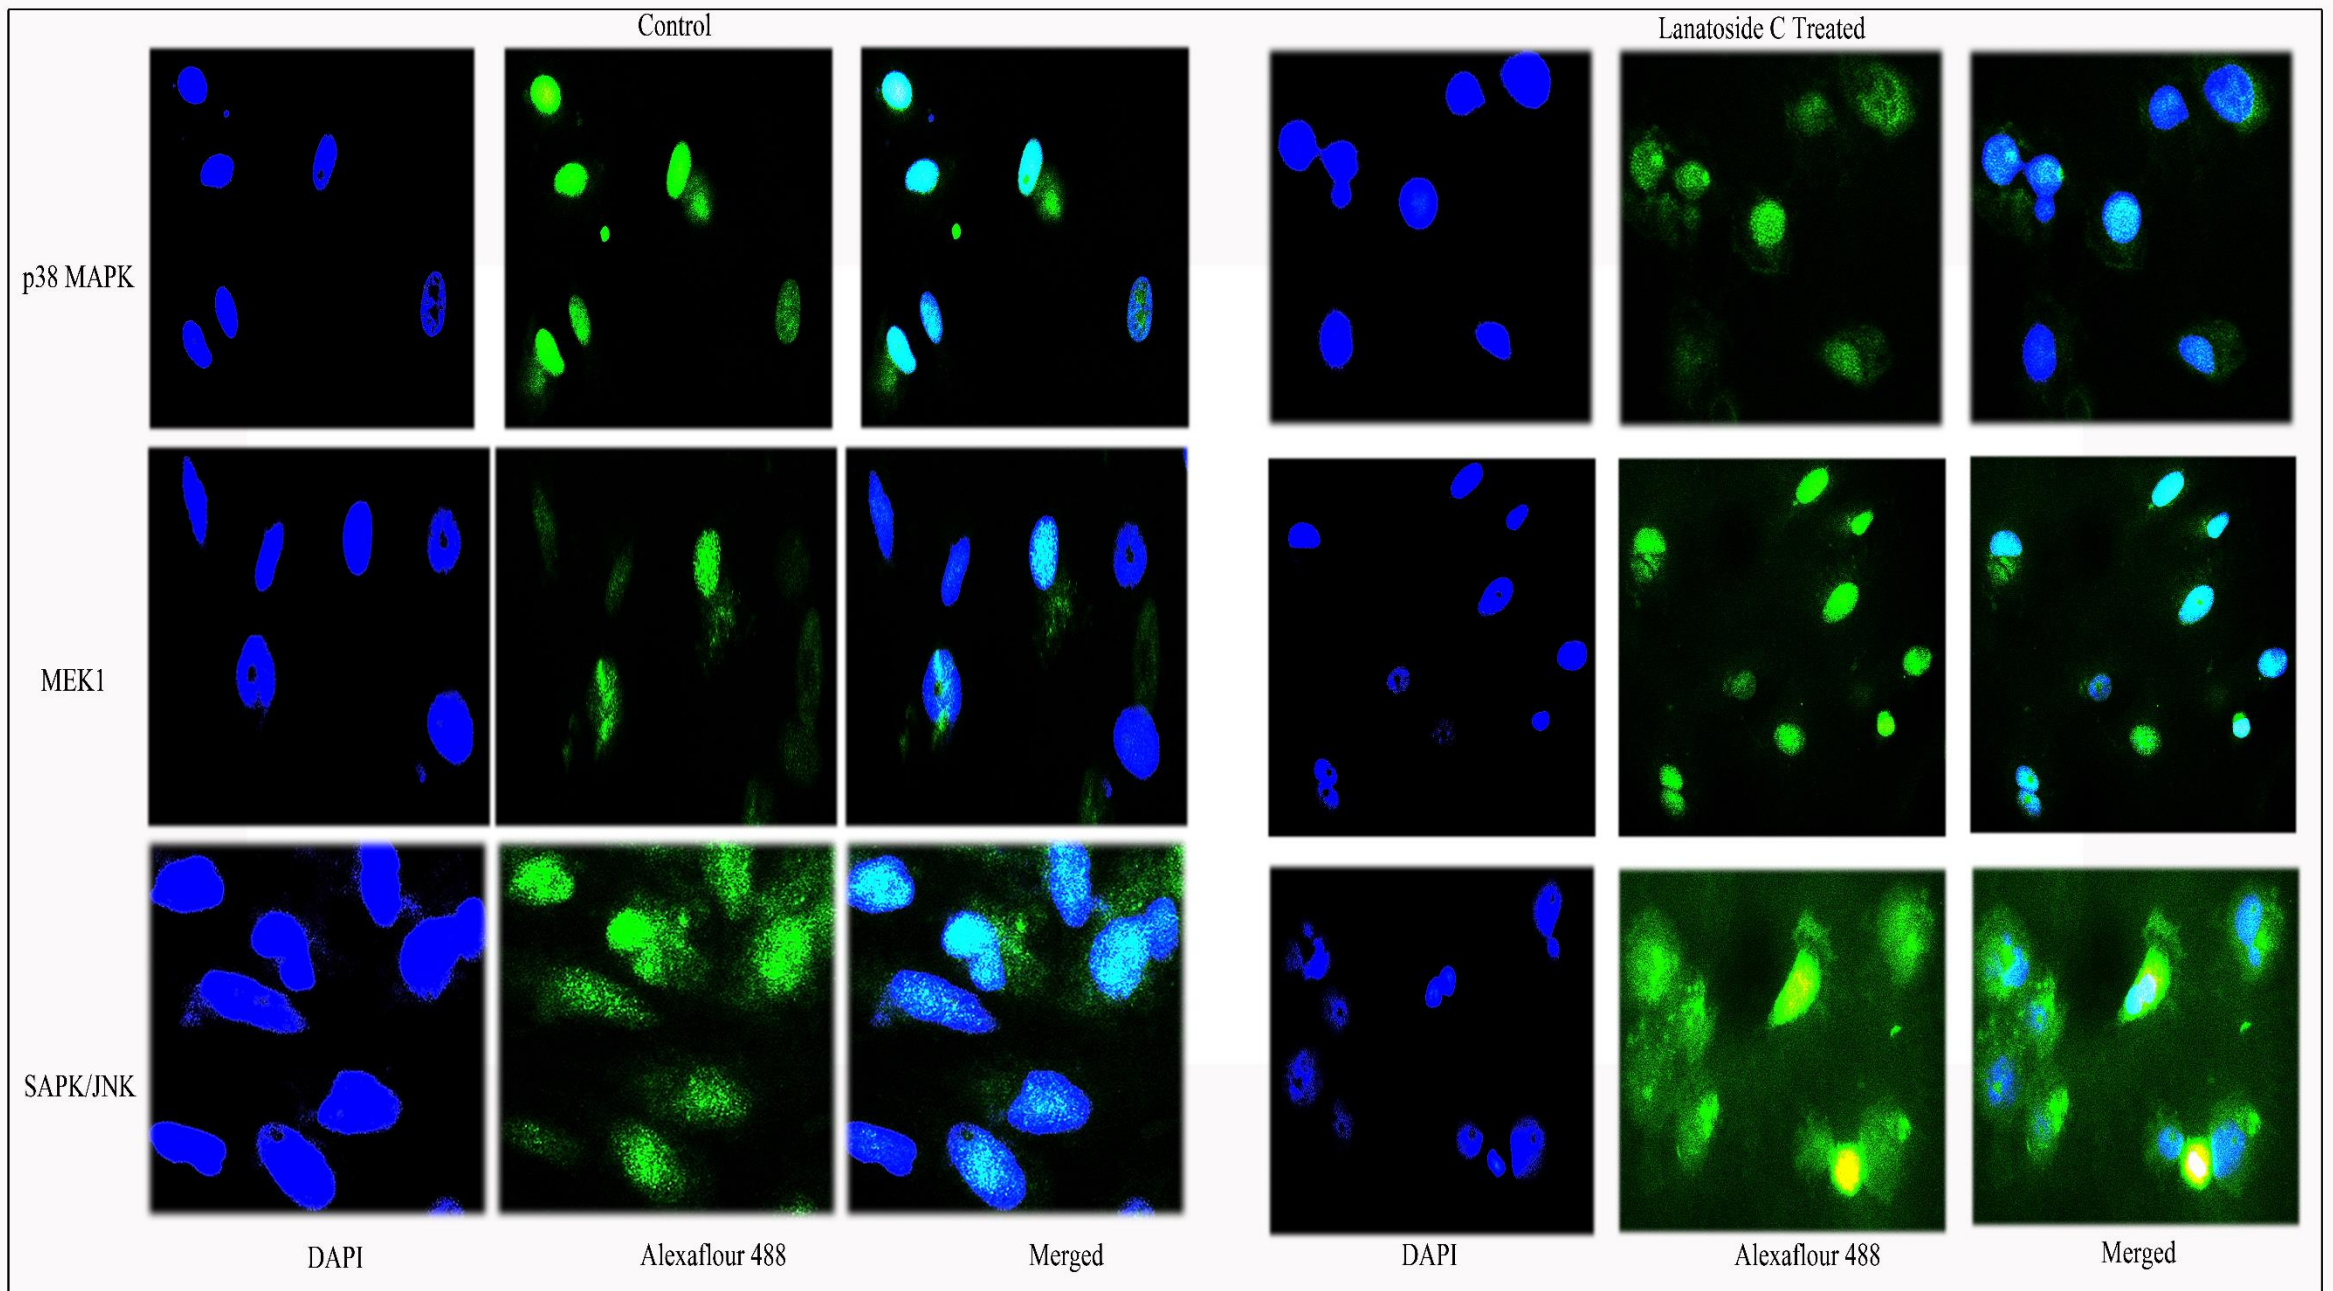

**Supplementary Fig. 3C:** Immunofluorescence imaging for the analysis of protein localisations of p38MAPK, MEK1 and SAPK/JNK in Lanatoside C induced MCF-7 cells.



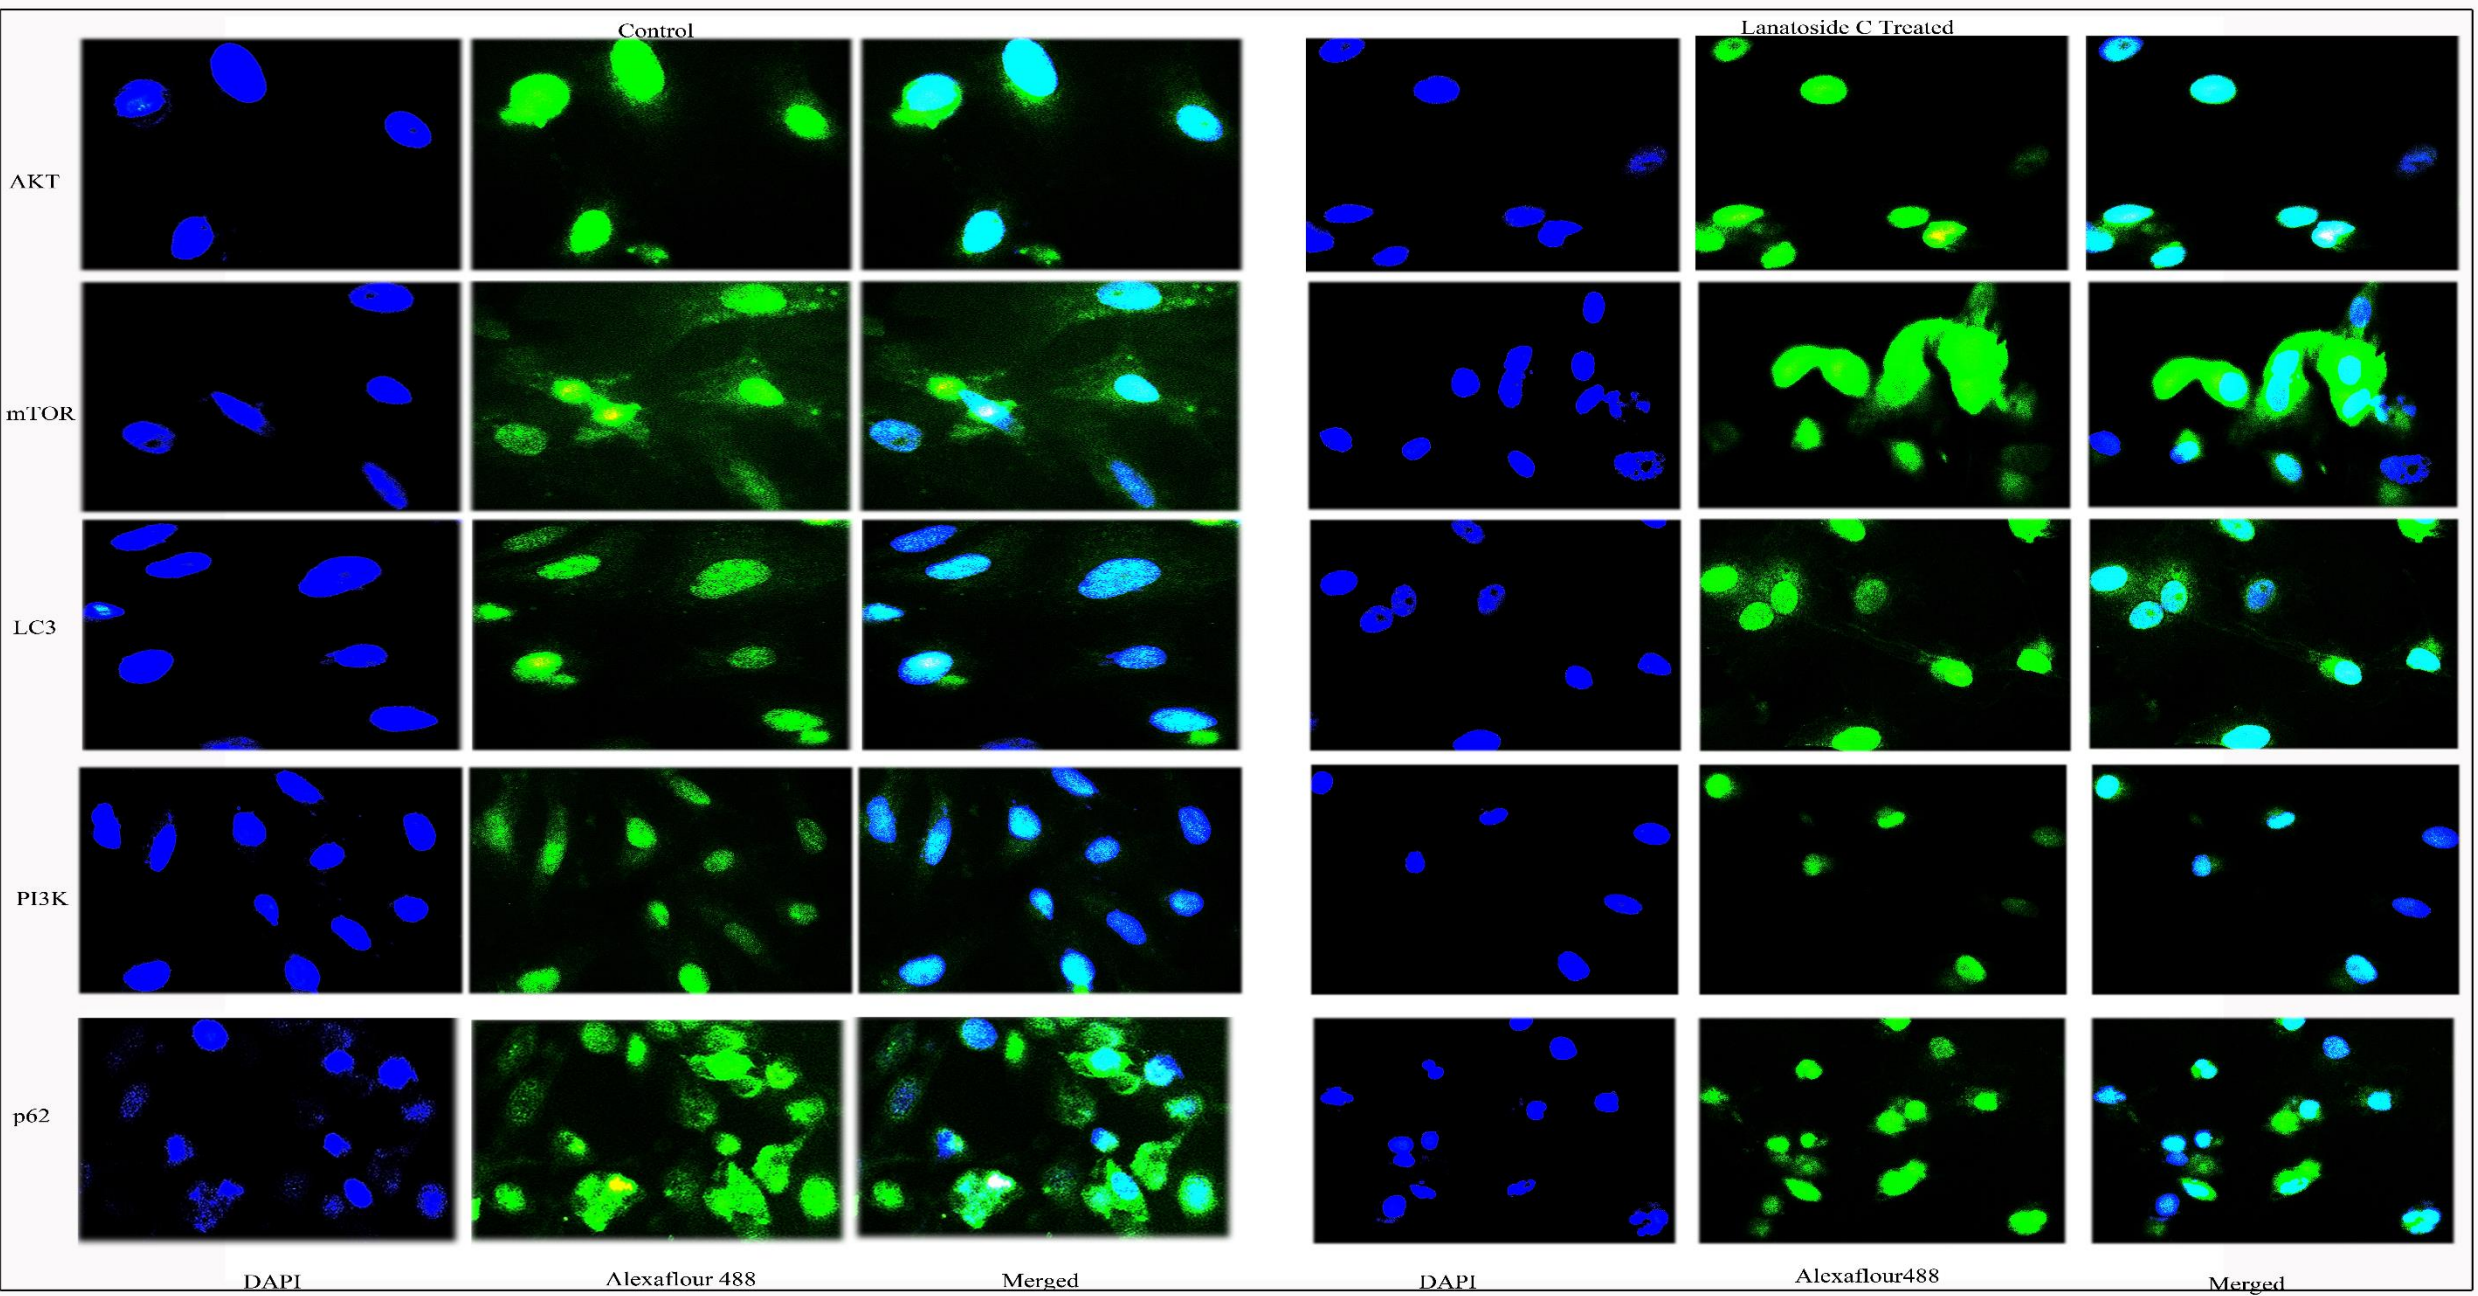

**Supplementary Fig. 3D:** Immunofluorescence imaging for the analysis of protein localisations in AKT, mTOR, LC3, PI3K and p62 in Lanatoside C induced MCF-7 cells.

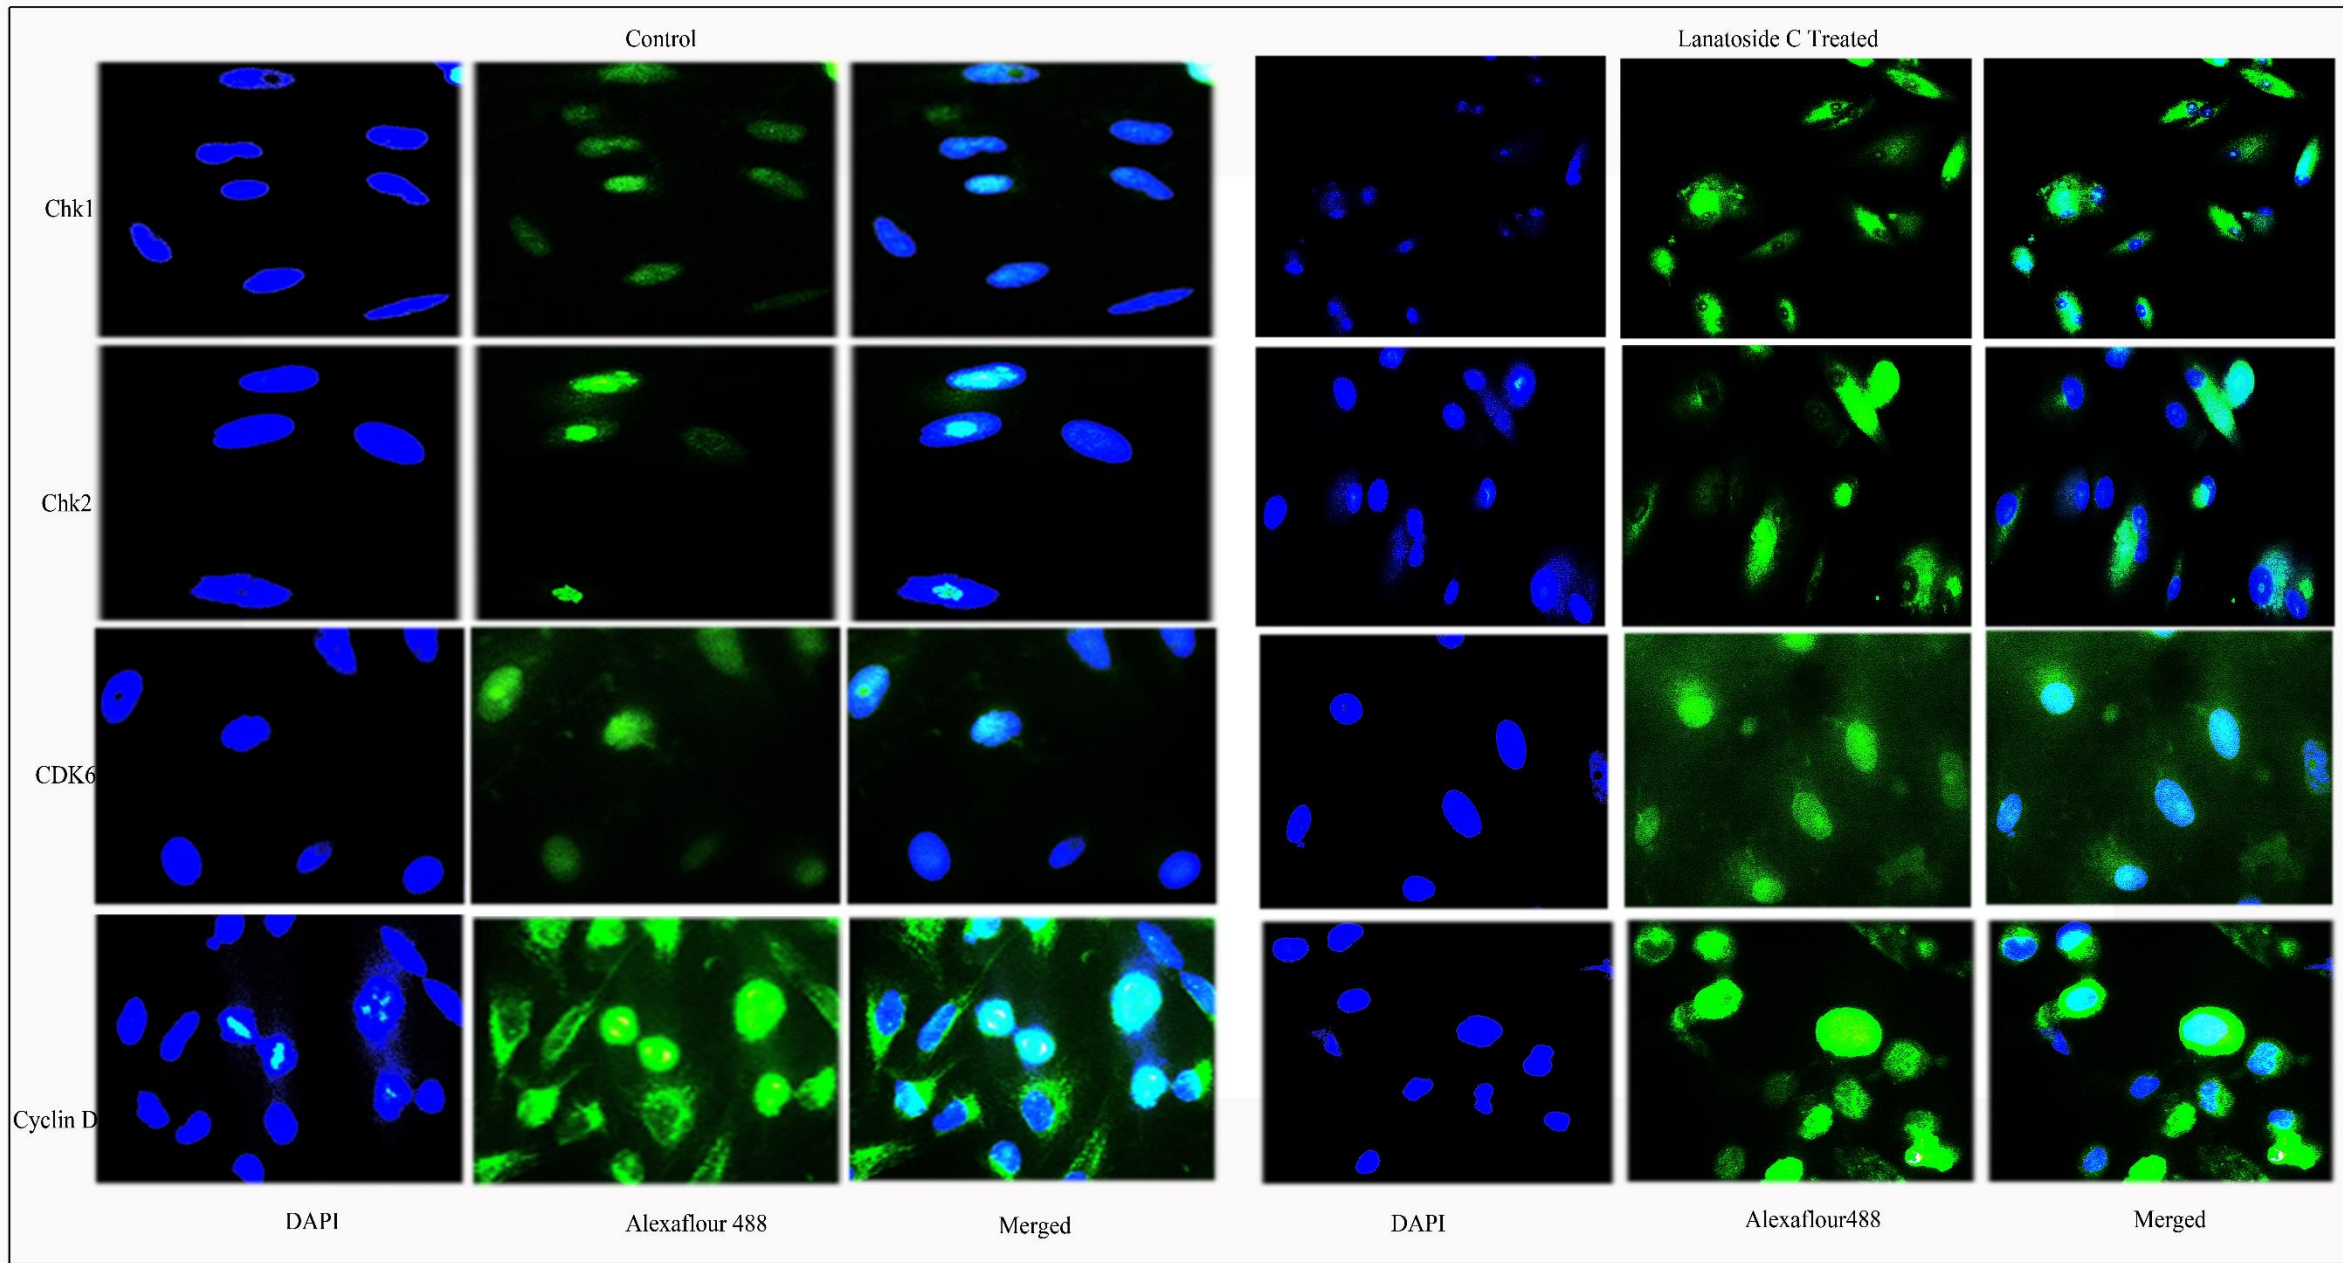

**Supplementary Fig. 4A:** Immunofluorescence imaging for the analysis of protein localisations of Chk1, Chk2, CDK6 and Cyclin D1 in Lanatoside C induced A549 cells.

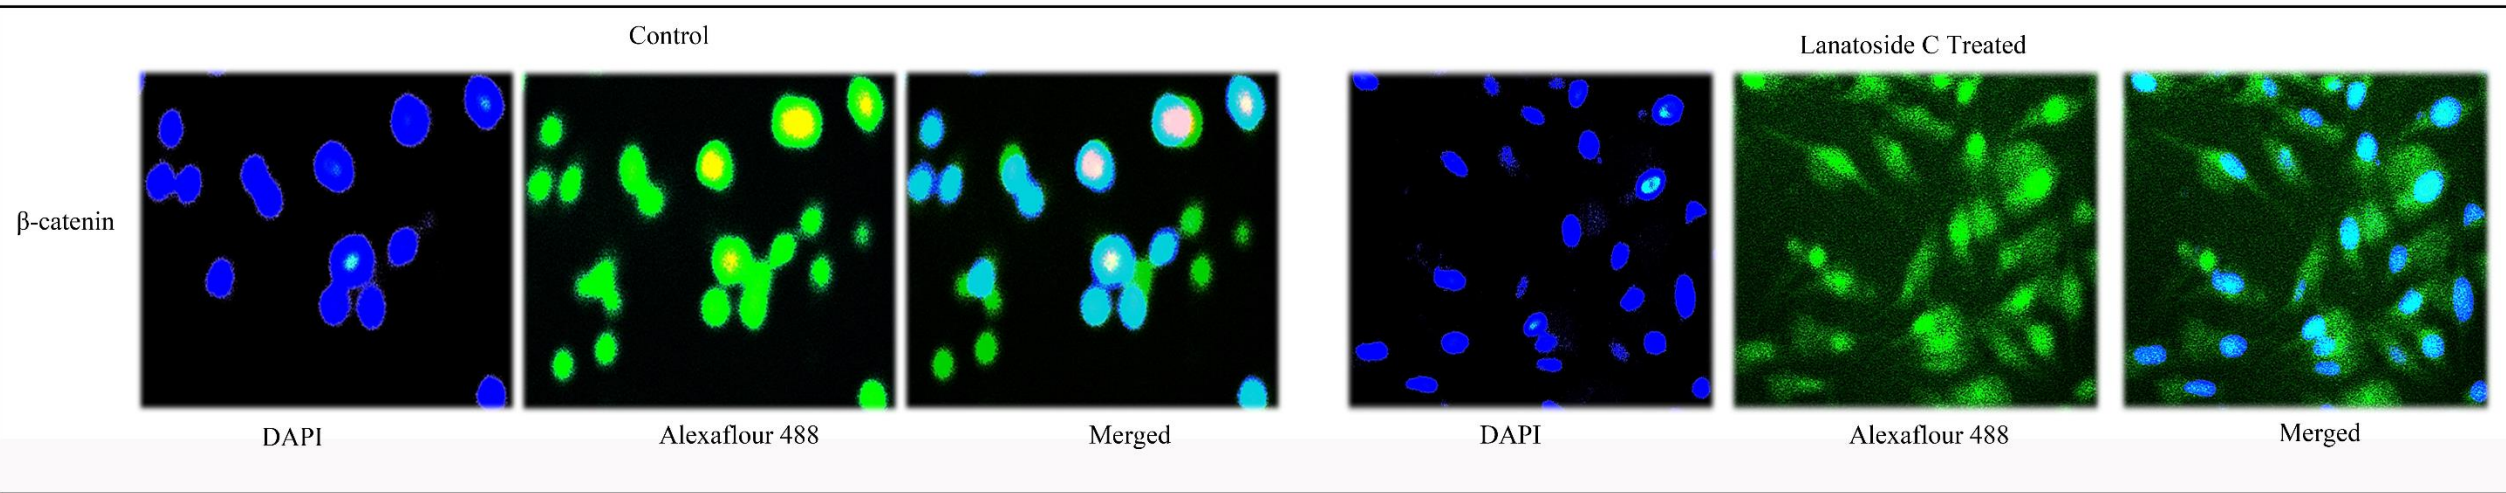

**Supplementary Fig. 4B:** Immunofluorescence imaging for the analysis of protein localisation of  $\beta$ -catenin in Lanatoside C induced A549 cells.

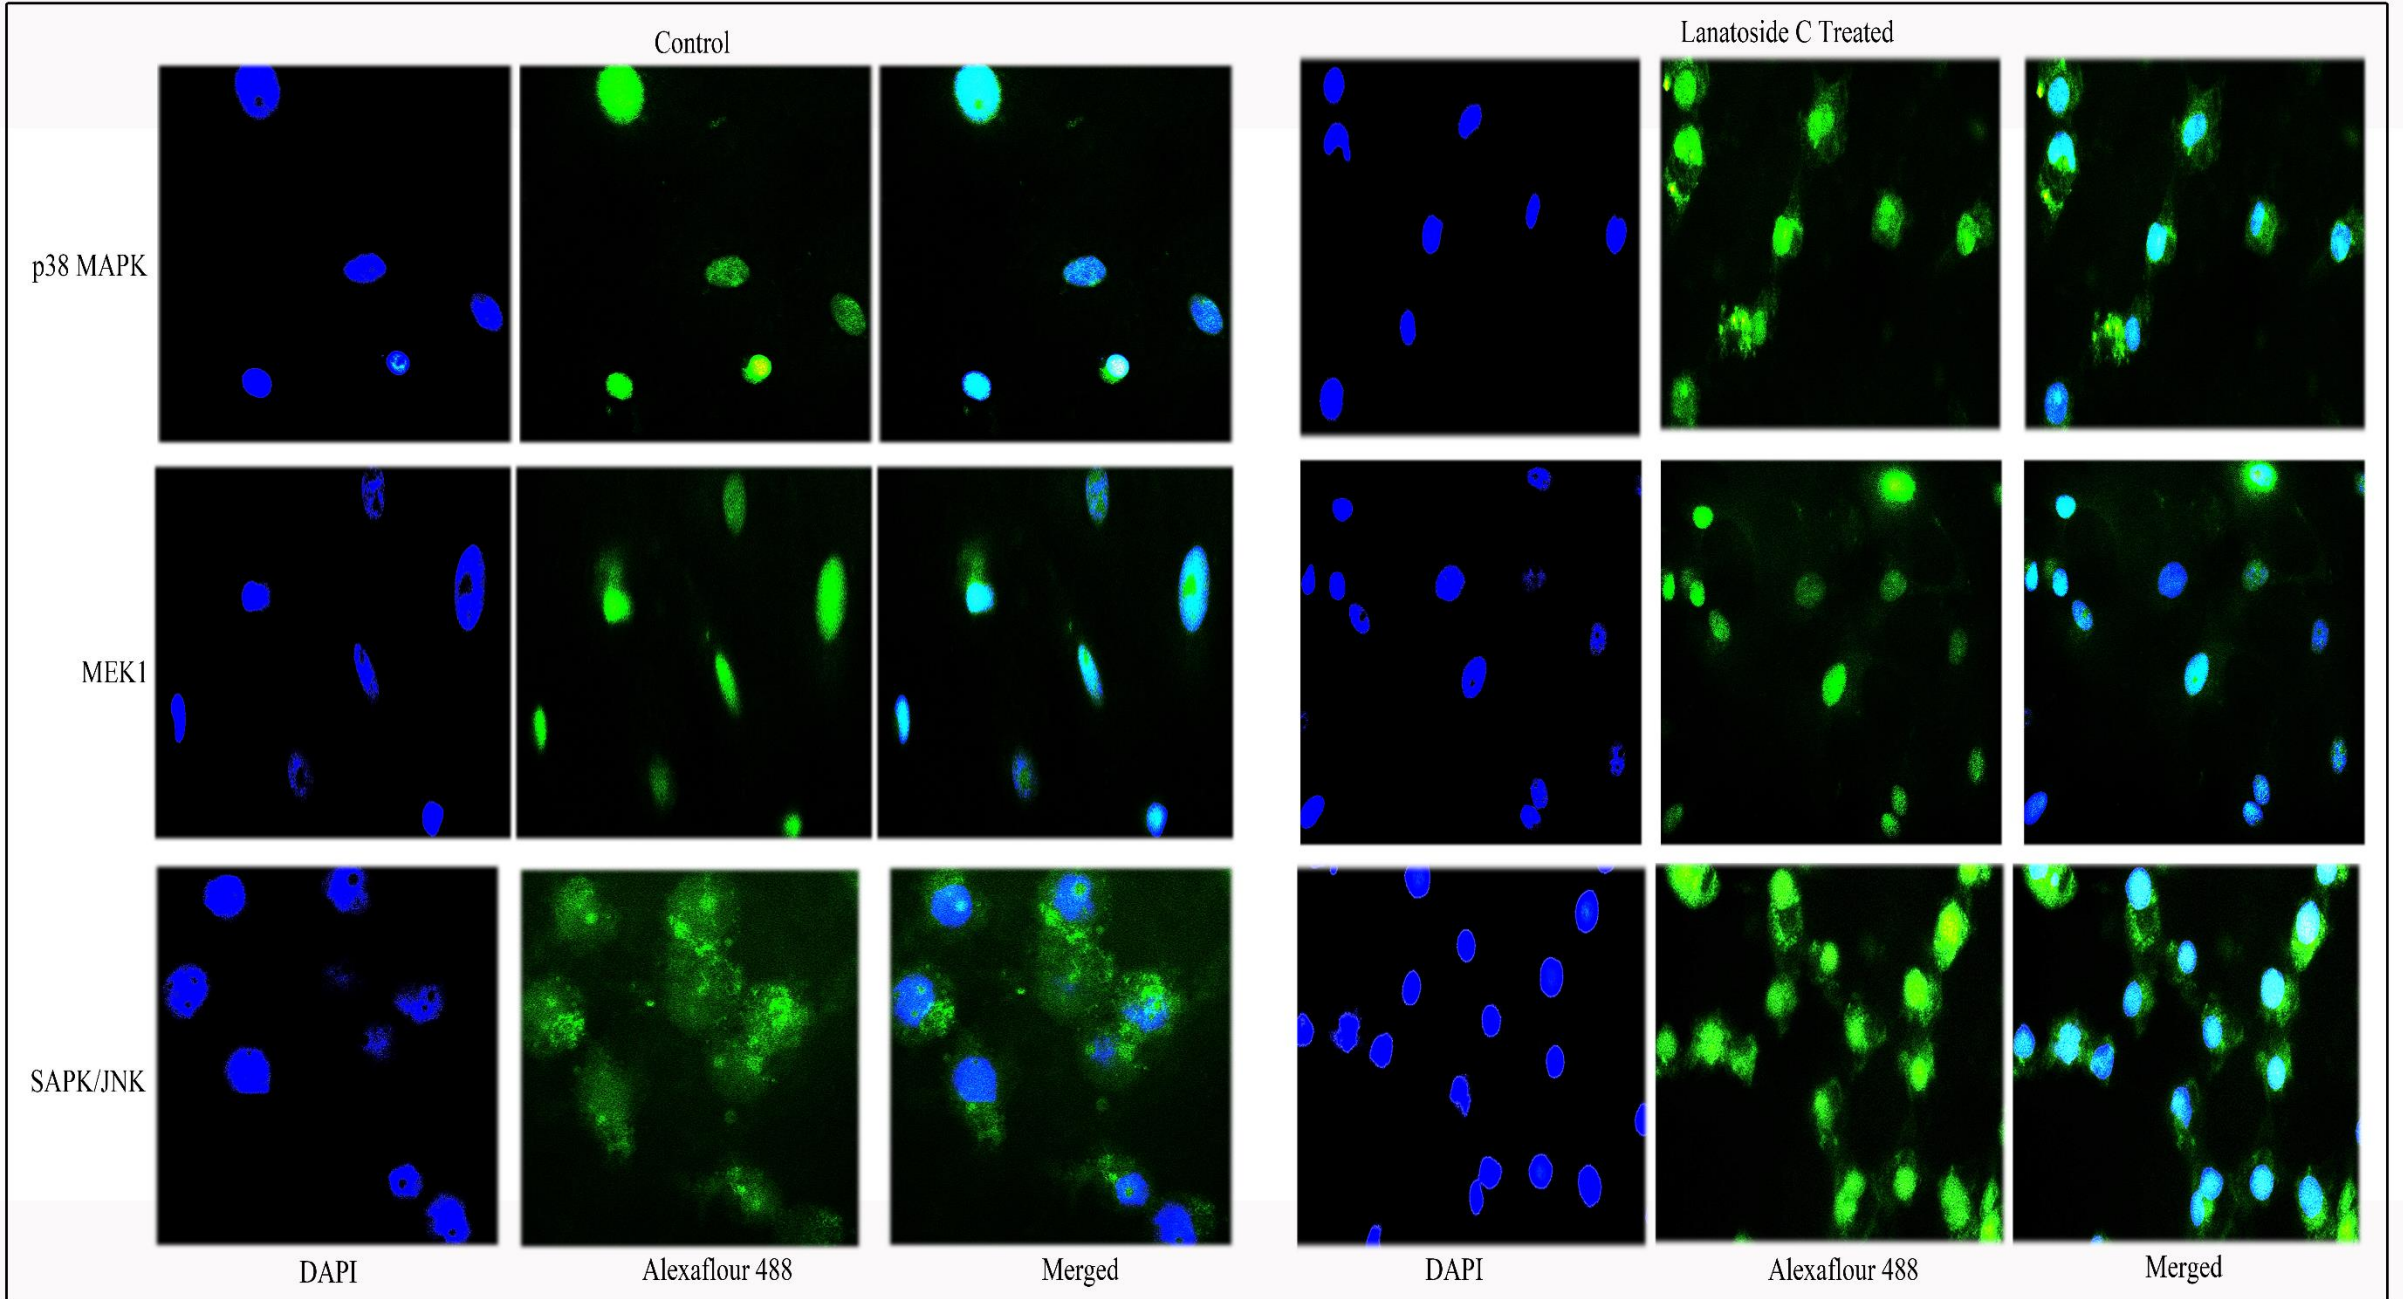

**Supplementary Fig. 4C:** Immunofluorescence imaging for the analysis of protein localisations of p38MAPK, MEK1 and SAPK/JNK in Lanatoside C induced A549 cells.

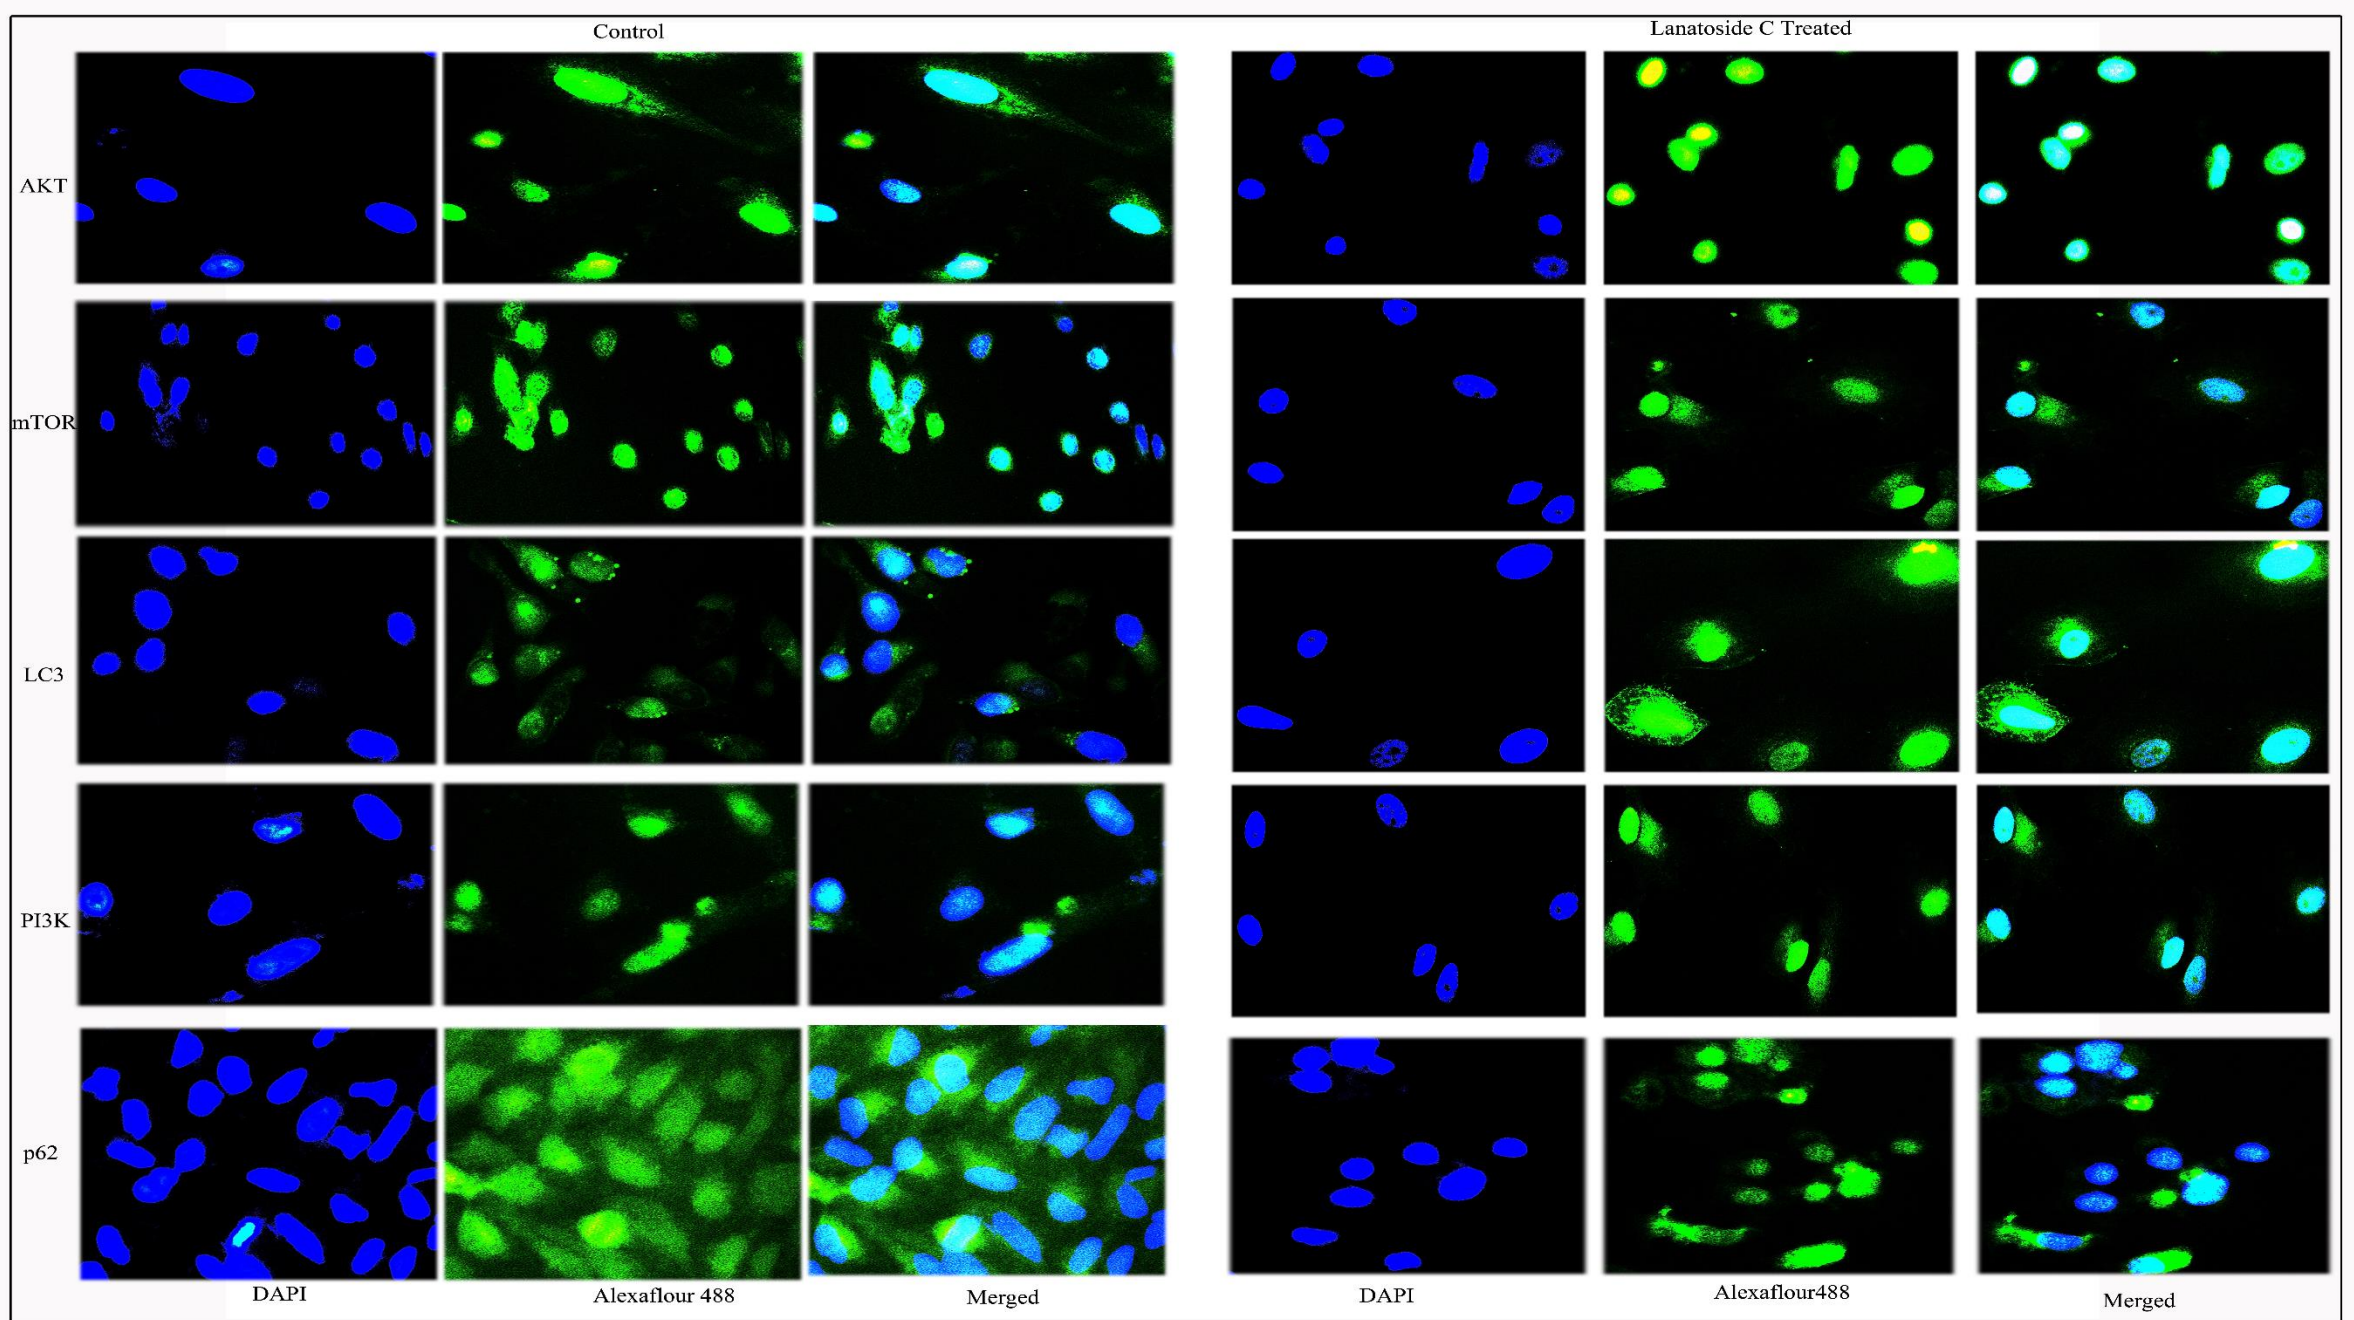

**Supplementary Fig. 4D:** Immunofluorescence imaging for the analysis of protein localisations in AKT, mTOR, LC3, PI3K and p62 in Lanatoside C induced A549 cells.

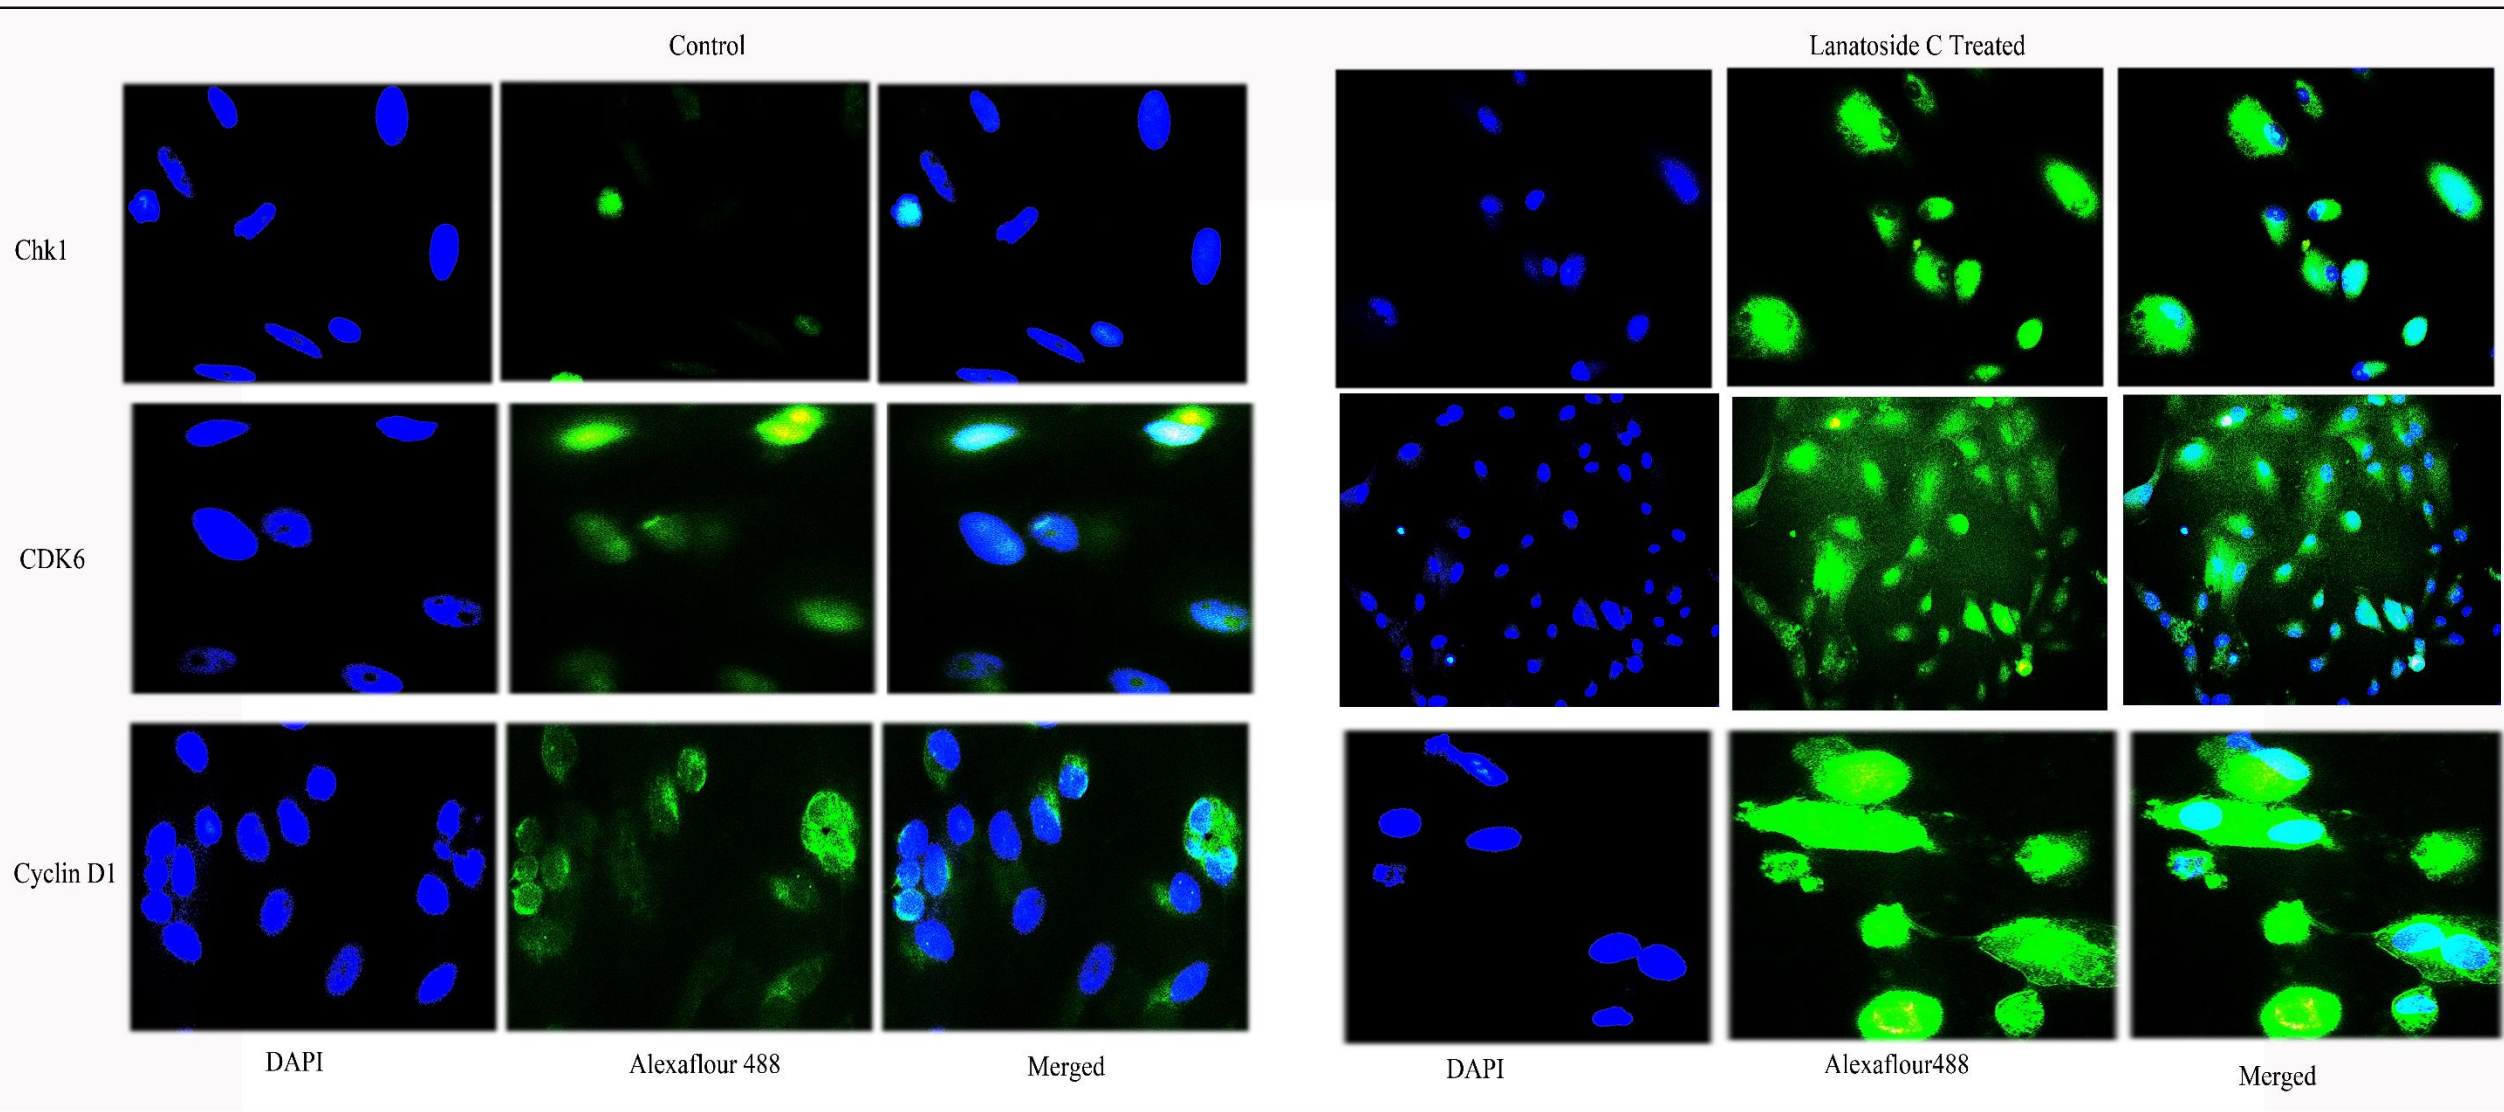

**Supplementary Fig. 5A:** Immunofluorescence imaging for the analysis of protein localisations of Chk1, CDK6 and Cyclin D1 in Lanatoside C induced A549 cells.

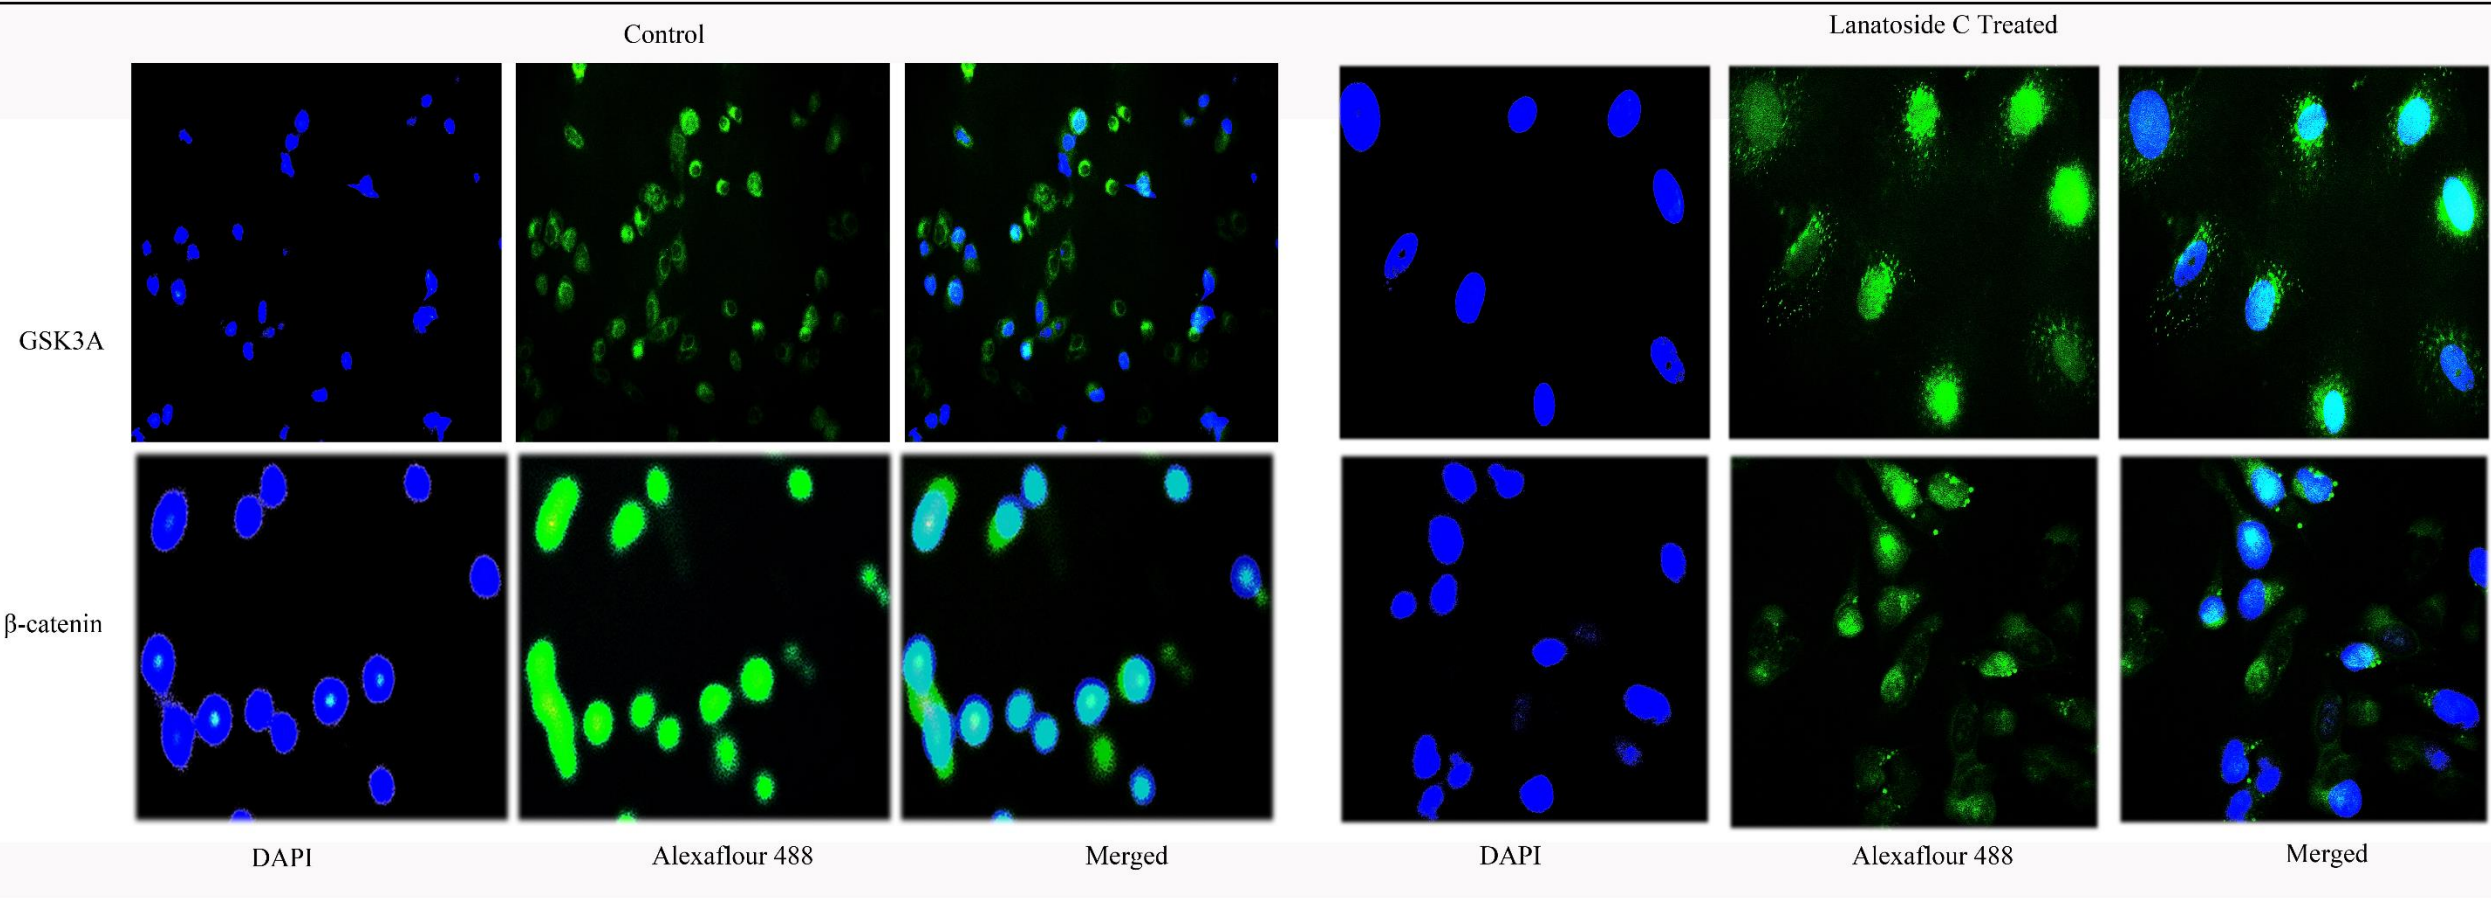

**Supplementary Fig. 5B:** Immunofluorescence imaging for the analysis of protein localisation of GSK3 $\alpha$  and  $\beta$ -catenin in Lanatoside C induced HepG2 cells.

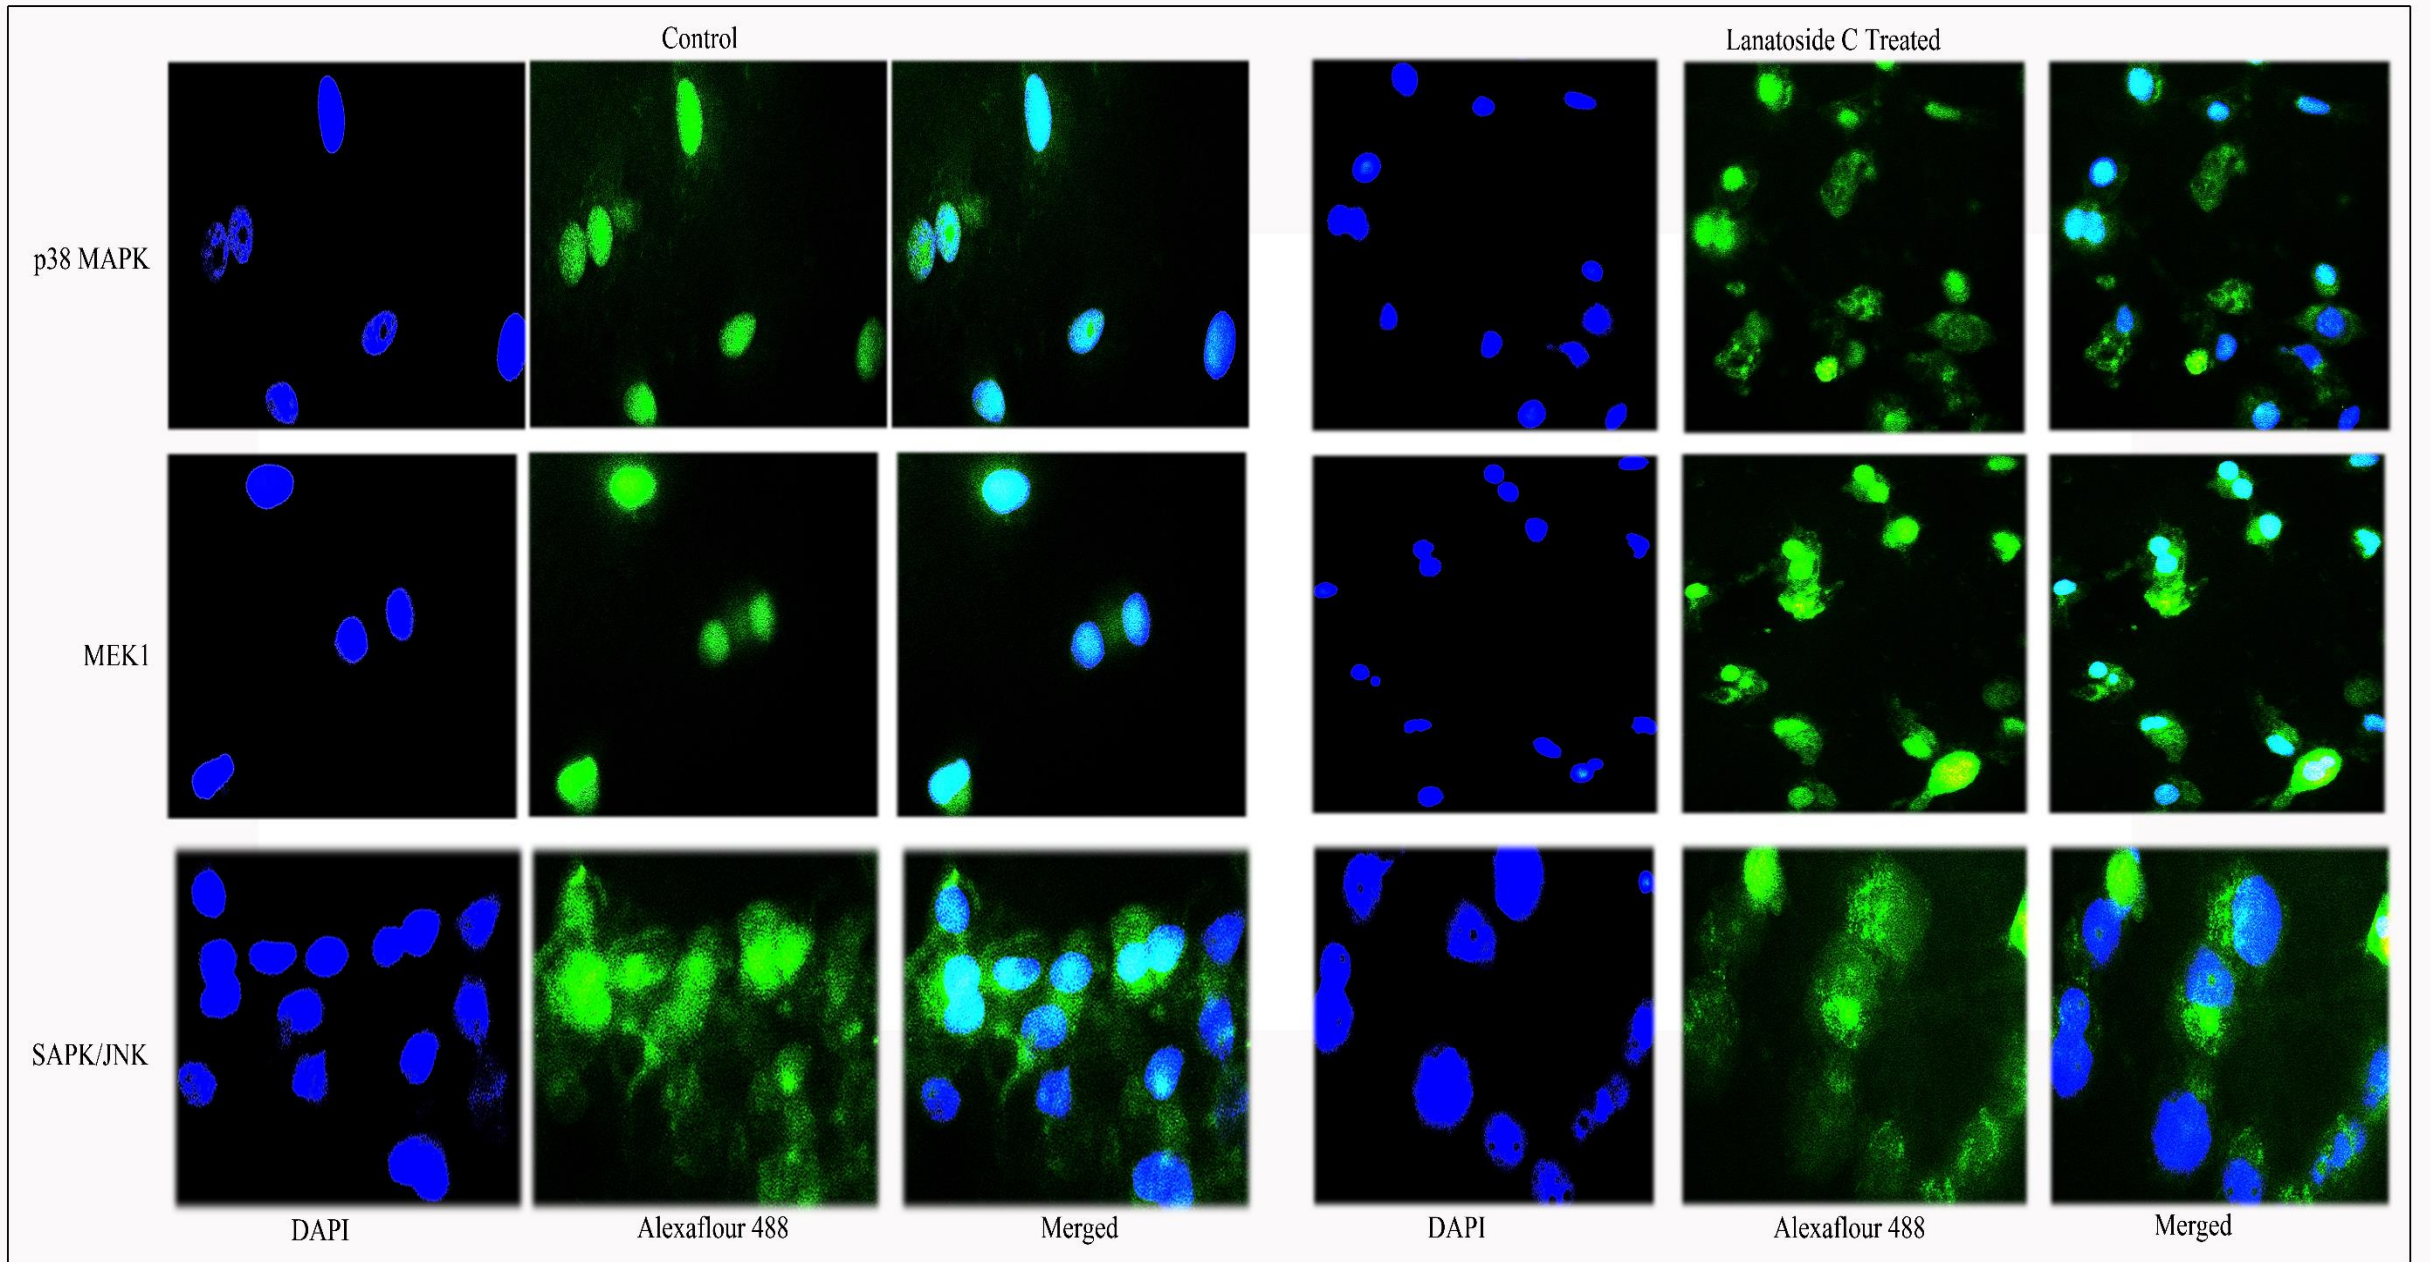

**Supplementary Fig. 5C:** Immunofluorescence imaging for the analysis of protein localisations of p38MAPK, MEK1 and SAPK/JNK in Lanatoside C induced HepG2 cells.



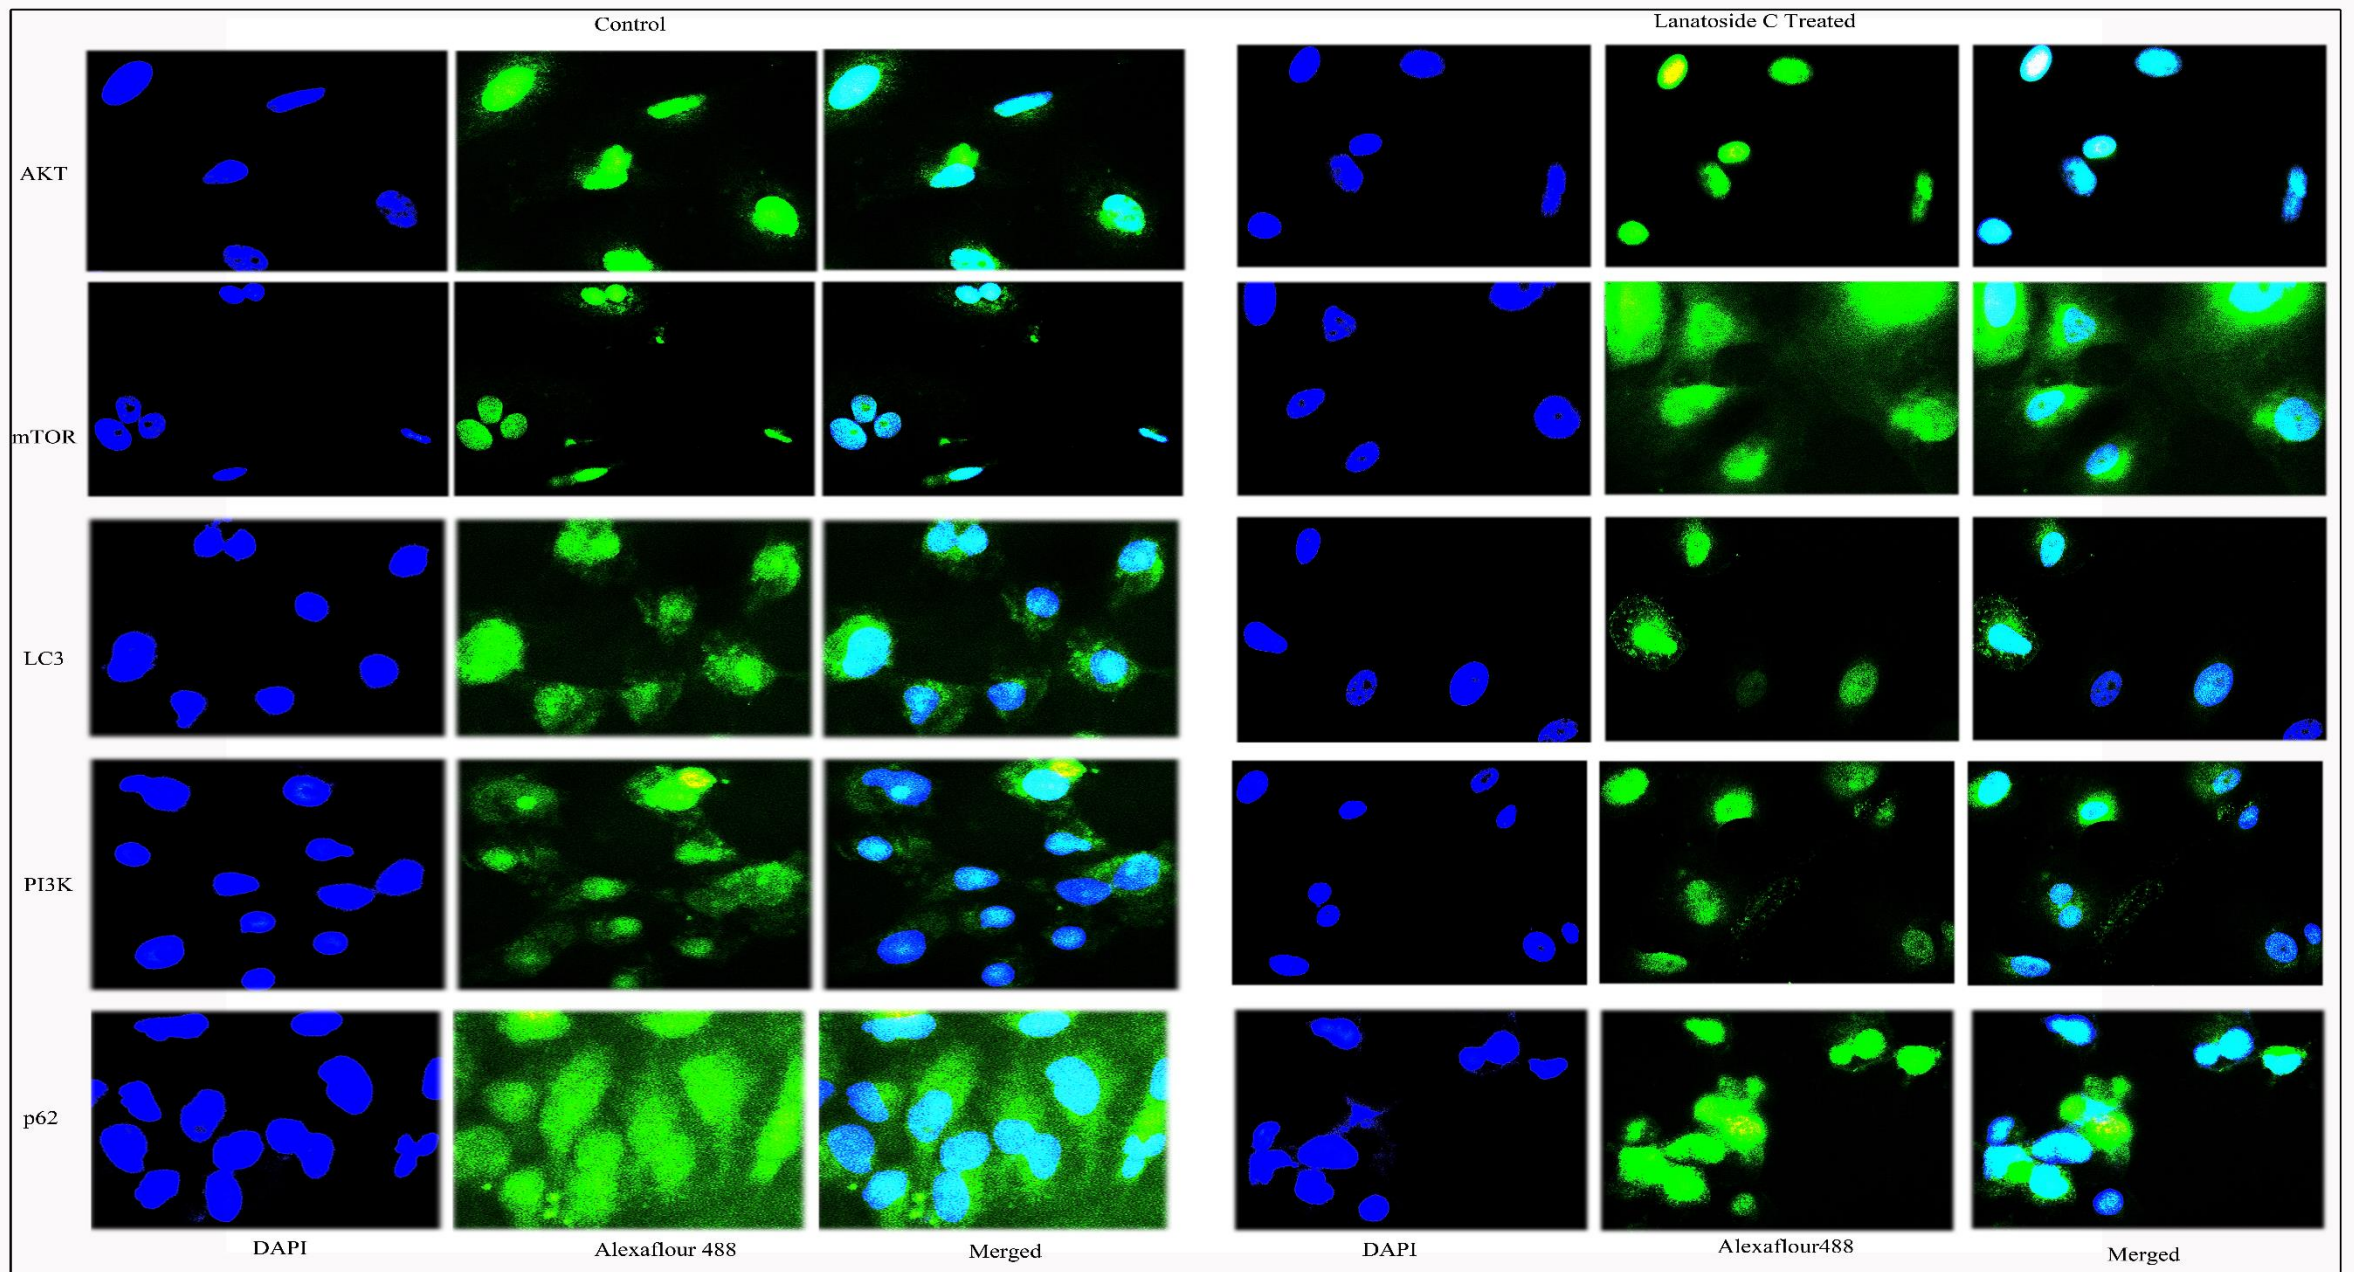

**Supplementary Fig. 5D:** Immunofluorescence imaging for the analysis of protein localisations in AKT, mTOR, LC3, PI3K and p62 in Lanatoside C induced HepG2 cells.

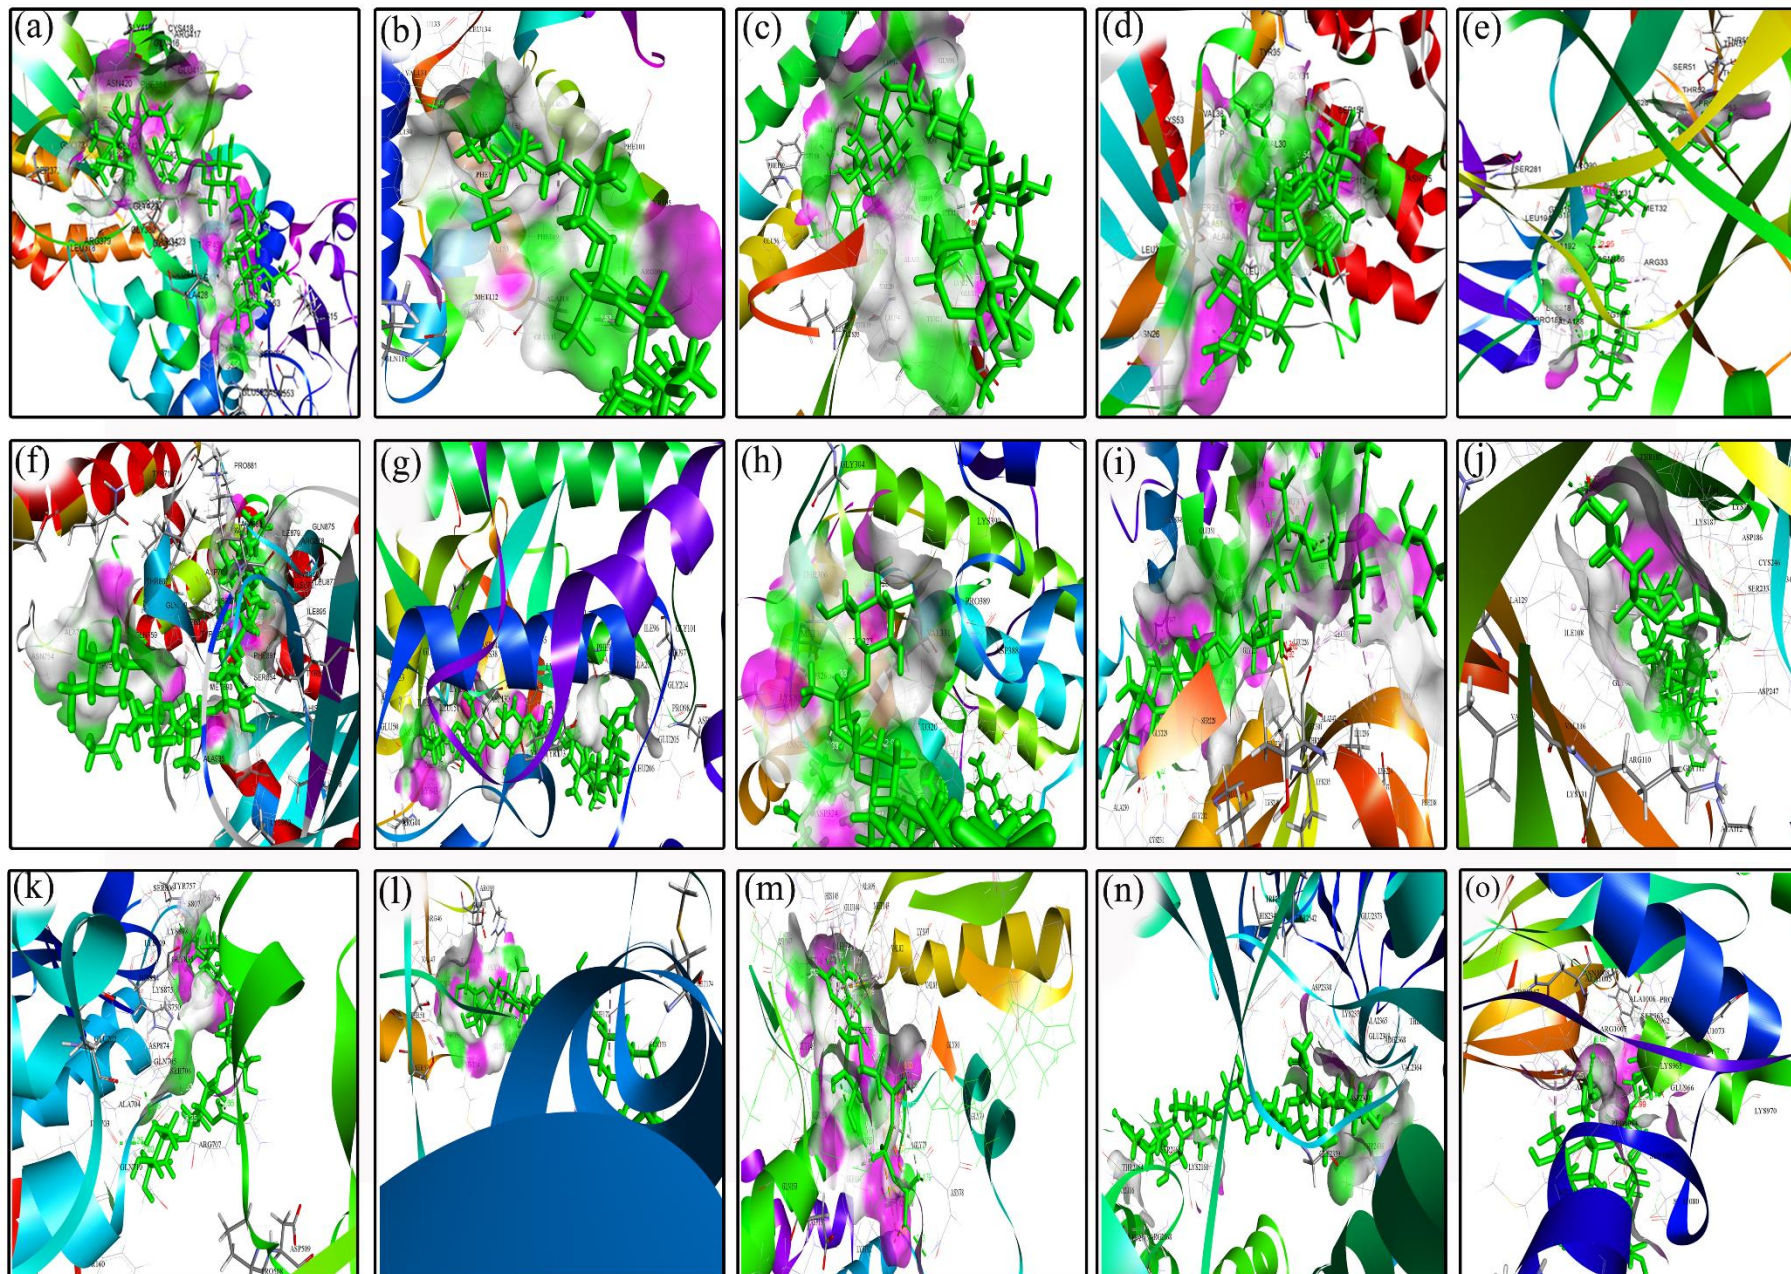

**Supplementary Fig 6:** Docking complexes of target protein and ligand (a) STAT3, (b) Bcl-2, (c) Cyclin D1, (d) p38, (e) NF-kB, (f) PARP, (g) Chk1, (h) AKT, (i) Chk2, (j) JNK, (k) PI3K, (l) CDK6, (m) MEK1, (n) mTOR, and (o) JAK.
